# 1 Regulation with cell size ensures mitochondrial DNA homeostasis during 2 cell growth

3 Anika Seel<sup>1</sup>, Francesco Padovani<sup>1</sup>, Alissa Finster<sup>1</sup>, Moritz Mayer<sup>2</sup>, Daniela Bureik<sup>1</sup>, Christof Osman<sup>3</sup>,  
4 Till Klecker<sup>2</sup>, Kurt M. Schmoller<sup>1,4</sup>

5 <sup>1</sup>Institute of Functional Epigenetics, Helmholtz Zentrum München, 85764 Neuherberg, Germany

6 <sup>2</sup>Institute of Cell Biology, University of Bayreuth, 95440 Bayreuth, Germany

7 <sup>3</sup>Faculty of Biology, Ludwig-Maximilian-Universität München, 82152 Planegg-Martinsried, Germany

8 <sup>4</sup>German Center for Diabetes Research (DZD), 85764 Neuherberg, Germany

9 \*correspondence: kurt.schmoller@helmholtz-muenchen.de  
10

## 11 Abstract

12 *To maintain stable DNA concentrations, proliferating cells need to coordinate DNA replication with cell*  
13 *growth. For nuclear DNA, eukaryotic cells achieve this by coupling DNA replication to cell cycle*  
14 *progression, ensuring that DNA is doubled exactly once per cell cycle. By contrast, mitochondrial DNA*  
15 *replication is typically not strictly coupled to the cell cycle, leaving the open question of how cells maintain*  
16 *the correct amount of mitochondrial DNA during cell growth. Here, we show that in budding yeast,*  
17 *mitochondrial DNA copy number increases with cell volume, both in asynchronously cycling populations*  
18 *and during G1 arrest. Our findings suggest that cell-volume-dependent mitochondrial DNA maintenance*  
19 *is achieved through nuclear encoded limiting factors, including the mitochondrial DNA polymerase Mip1*  
20 *and the packaging factor Abf2, whose amount increases in proportion to cell volume. By directly linking*  
21 *mitochondrial DNA maintenance to nuclear protein synthesis, and thus cell growth, constant*  
22 *mitochondrial DNA concentrations can be robustly maintained without a need for cell-cycle-dependent*  
23 *regulation.*

24

25

## 26 Introduction

27 As cells grow during the cell cycle, they need to double their DNA content so that each daughter cell  
28 obtains the appropriate amount. In fact, it is one of the major tasks of the eukaryotic cell cycle to ensure  
29 that nuclear DNA is replicated once – and only once – during S-phase, and decades of extensive research  
30 provided us with a detailed molecular understanding of this process (Sclafani and Holzen, 2007;  
31 Ekundayo and Bleichert, 2019). By contrast, how this is achieved for mitochondrial DNA (mtDNA), the  
32 other major type of DNA in virtually all eukaryotes, is largely unclear.

33 In many organisms, including humans and yeasts, mtDNA encodes proteins essential for oxidative  
34 phosphorylation and is typically present in many copies (Gustafsson et al., 2016; Aretz et al., 2020).  
35 mtDNA is organized in ‘nucleoids’, nucleoprotein complexes that are distributed throughout the  
36 mitochondrial network and can contain one or several copies of mtDNA (Kukat et al., 2011; Göke et al.,  
37 2020). While several regulators of mtDNA that affect mtDNA copy number have been identified (Göke et  
38 al., 2020), including the nucleoid protein TFAM (Ekstrand et al., 2004) and its homolog Abf2 in yeast  
39 (Zelenaya-Troitskaya et al., 1998), mtDNA polymerase (Stumpf et al., 2010), and helicases (Tynismaa  
40 et al., 2004; Taylor et al., 2005), how cells maintain the correct number of mtDNA throughout cell growth  
41 is unknown. In contrast to replication of nuclear DNA, mtDNA replication is not strictly coupled to cell  
42 cycle progression. While some studies report cell-cycle-dependent modulation of mtDNA replication rates  
43 for human cells (Lee et al., 2007; Chatre and Ricchetti, 2013; Sasaki et al., 2017), mtDNA replication  
44 occurs throughout the cell cycle and even continues during long cell cycle arrests (Petes and Fangman,  
45 1973; Wells, 1974; Newton and Fangman, 1975; Conrad and Newlon, 1982). However, if mtDNA  
46 replication is not controlled by cell cycle progression, how can cells then coordinate the amount of mtDNA  
47 produced with cell growth?

48 One alternative to regulation by the cell cycle is that mitochondrial homeostasis is directly linked to cell  
49 size. Indeed, it has been shown that the total amount of mitochondria in budding yeast (Rafelski et al.,  
50 2012), HeLa (Posakony et al., 1977), mouse liver (Miettinen et al., 2014), Jurkat and *Drosophila* Kc167

51 cells (Miettinen and Björklund, 2016) increases roughly in proportion to cell volume. In addition, the  
52 number of nucleoids in budding yeast correlates with mitochondrial network volume (Osman et al., 2015),  
53 and nucleoid number in fission yeast increases with increasing cell volume (Jajoo et al., 2016) –  
54 suggesting that also mtDNA copy number might be linked to cell volume. However, direct evidence for a  
55 role of cell volume for mtDNA homeostasis is missing.

56 Here, we show that in budding yeast, the number of mtDNA copies and nucleoids increases in direct  
57 proportion to cell volume. We find that mtDNA maintenance is limited by nuclear encoded proteins whose  
58 abundance increases with cell volume. Supported by mathematical modelling, our results suggest a  
59 mechanism in which the overall increase of cellular protein synthesis with increasing cell volume couples  
60 mtDNA copy number to cell volume, achieving robust mtDNA homeostasis during cell growth and cell  
61 cycle progression.

62

## 63 **Results**

### 64 **mtDNA copy number increases with cell volume**

65 As a first step to understand the role of cell size in the regulation of mtDNA copy number, we measured  
66 the dependence of mtDNA copy number on cell volume in budding yeast. We used haploid and diploid  
67 strains carrying the cell size regulator *WHI5* under control of a synthetic,  $\beta$ -estradiol inducible promoter  
68 (Ottoz et al., 2014). Whi5 modulates G1 duration by inhibiting the major G1/S transcription factor SBF.  
69 Overexpression of Whi5 by addition of  $\beta$ -estradiol to the media therefore initially causes a prolonged G1  
70 phase and an increase of cell volume. Eventually, cells reach a cell volume large enough to allow division  
71 even at the increased Whi5 expression (Schmoller et al., 2015), and after 24 hours of growth in  
72 exponential phase, this results in a new steady state of asynchronous cell populations with increased  
73 mean cell volumes (Claude et al., 2021; Kukhtevich et al., 2020) (Fig. 1a). We grew cells on synthetic  
74 complete media with 2% glycerol and 1% ethanol as carbon source (SCGE). Using  $\beta$ -estradiol

75 concentrations ranging from 0 to 30 nM (haploid) or 60 nM (diploid) as well as wild-type strains without  
76 inducible-Whi5, we obtained steady-state cultures with a more than 4-fold range in mean cell volume  
77 (Supplementary Fig. 1), but similar doubling times and only moderately shifted cell cycle fractions (Claude  
78 et al., 2021). For each culture, we measured cell volume using a Coulter counter, determined bud  
79 fractions by visual inspection, purified DNA, and performed qPCR measurements on nuclear and mtDNA  
80 to determine the average number of mtDNA copies per cell. For both haploids and diploids, we found  
81 that mtDNA copy number increases roughly in direct proportion with cell volume (Fig. 1b).

82 We next asked whether this increase of mtDNA amount with cell volume is specific to non-fermentable  
83 media, in which respiratory activity and thus also functional mtDNA is essential. We therefore repeated  
84 the experiments using synthetic complete media with 2% glucose (SCD), in which mtDNA is not essential  
85 for budding yeast growth. Again, we found that the amount of mtDNA increases with cell volume, but at  
86 a given cell volume, cells grown on SCD have less mtDNA compared to cells grown on SCGE (Fig. 1b).

87 To test whether the observed increase of mtDNA is due to the increase in cell volume rather than linked  
88 to Whi5 overexpression, we then sought for an alternative approach to obtain cells of different volume.  
89 We used a haploid strain in which all three endogenous G1-cyclins (*CLN1/2/3*) were deleted, and which  
90 is kept alive by a  $\beta$ -estradiol-inducible copy of *CLN1* (Ewald et al., 2016). Upon removal of  $\beta$ -estradiol  
91 from the media, the cells arrest in G1 while continuously growing (Supplementary Fig. 2). We collected  
92 cells at different time points of the G1 arrest, again measuring cell volume, bud fractions, and mtDNA  
93 copy number (Fig. 1a). Consistent with mtDNA being replicated also in G1 (Petes and Fangman, 1973;  
94 Newton and Fangman, 1975), and confirming the results obtained with the Whi5-inducible system, we  
95 found that as cells grow during G1, mtDNA copy number continuously increases (Fig. 1c). Again, we  
96 found that mtDNA copy number is lower on SCD than on SCGE media.

97

98 **Nucleoid number increases with cell volume**

99 mtDNA is organized in nucleoprotein complexes called nucleoids, which in budding yeast are distributed  
100 throughout the mitochondrial network (Osman et al., 2015). In principle, the increase in mtDNA with cell  
101 volume could either be due to an increased number of nucleoids, or an increase in the number of mtDNA  
102 copies per nucleoid. To distinguish between the two scenarios, we adapted a previously established  
103 system to visualize mtDNA in live cells (Osman et al., 2015). Briefly, we introduced inducible-Whi5 into  
104 haploid and diploid strains in which LacO arrays have been stably integrated into the mitochondrial  
105 genome (Fig. 2a). A constitutively expressed LacI tagged with two copies of mNeon and a mitochondrial  
106 targeting sequence then binds to the LacO arrays, resulting in fluorescent foci detectable with confocal  
107 microscopy (Fig. 2b; Supplementary Fig. 3a). At the same time, we used the fluorescent protein mKate2  
108 targeted to the mitochondrial matrix to visualize the mitochondrial network. To maximize the observable  
109 range of cell volumes, we induced Whi5 expression in cells grown either on SCGE or SCD media with  
110 different concentrations of  $\beta$ -estradiol and then imaged cells with 3D-confocal microscopy. Using a  
111 custom image analysis pipeline, we then segmented cells based on bright field images, and segmented  
112 the mitochondrial network and identified mtDNA foci in 3 dimensions from fluorescence signals.  
113 Consistent with a previous report (Rafelski et al., 2012), the volume of the mitochondrial network  
114 increases in proportion with cell volume, with cells on SCD having less mitochondrial network than cells  
115 on SCGE (Fig. 2c). At the same time, we found that also the number of mtDNA foci (which we interpret  
116 as nucleoids) increases with cell volume, indicating an increase in the number of nucleoids rather than  
117 in the mtDNA copy numbers per nucleoid. In line with the reduced number of mtDNA copies per cell (Fig.  
118 1b-c), we detected fewer nucleoids at a given cell volume when cells were grown on SCD (Fig. 2d).

119 **The increase of mitochondrial network with cell volume is independent of mtDNA**

120 So far, we have shown that larger cells not only have more mitochondrial network, but also an increased  
121 amount of mtDNA and nucleoids. We therefore wondered whether the increase in mitochondrial network  
122 volume is a causal consequence of the increased mtDNA copy number. To address this question, we

123 deleted the only mitochondrial DNA polymerase in yeast, *MIP1*, which results in loss of mtDNA  
124 (Supplementary Table 1). Since mtDNA is not essential for budding yeast to grow on fermentable media,  
125 we could grow this strain on SCD media, and measure mitochondrial network volume as a function of  
126 cell volume. We noticed that these cells without mitochondrial DNA, called  $\rho^0$  cells, show a larger  
127 variability of cell volume, in particular after *Whi5* over-expression, and exhibit altered network morphology  
128 (Supplementary Fig. 3b-c). Nevertheless, the network volume still increases with cell volume, and at a  
129 given cell volume is similar to that in wild-type cells (Fig. 2e). Thus, the regulation of mitochondrial network  
130 volume with cell volume occurs either upstream or independent of mtDNA.

### 131 **Mitochondrial diameter is independent of cell volume**

132 Together with previous reports on yeast (Rafelski et al., 2012) and human cells (Posakony et al., 1977;  
133 Miettinen et al., 2014), our observation that mitochondrial network volume, mtDNA amount, as well as  
134 nucleoid number all increase with cell volume suggests that the total amount of mitochondria increases  
135 in larger cells but that the local mitochondrial structure is rather constant. To test if mitochondrial diameter  
136 changes with increasing cell volume, we analyzed haploid wild-type and *Whi5*-inducible cells grown in  
137 SCD in the absence or presence of  $\beta$ -estradiol by transmission electron microscopy and measured  
138 mitochondrial width (Fig. 2f; Supplementary Fig. 4). We observed neither changes in mean mitochondrial  
139 diameter nor obvious alterations of mitochondrial inner membrane structure associated with increasing  
140 cell volume upon *Whi5* overexpression (Fig. 2f-g). Taken together, our results indicate that the  
141 mitochondrial diameter is not influenced by cell volume.

### 142 **Amount of mtDNA maintenance factors increases with cell volume**

143 In summary, we have shown that mtDNA copy number is tightly linked to cell volume both in  
144 asynchronous as well as G1-arrested cells. In principle, this coupling of mtDNA to cell volume allows  
145 cells to maintain mtDNA concentrations during cell growth: If mtDNA copy numbers are set by cell volume  
146 at any point during the cell cycle, constant concentrations can be achieved without any dedicated

147 regulation of mtDNA replication with cell cycle progression. This then raises the question of how mtDNA  
148 copy number can be coordinated with cell volume.

149 Most proteins increase in abundance as cells get bigger, maintaining constant concentrations (Swaffer  
150 et al., 2021a). This overall increase of protein production is thought to be due to an increased abundance  
151 of ribosomes (Marguerat and Bähler, 2012; Schmoller and Skotheim, 2015), but also an increase of  
152 global transcription, and thus mRNA amounts (Wu et al., 2010; Zhurinsky et al., 2010; Padovan-Merhar  
153 et al., 2015; Sun et al., 2020; Swaffer et al., 2021b).

154 One possible mechanism of how mtDNA number could be linked to cell volume is that similar to most  
155 genes, mitochondrial maintenance factors encoded by the nuclear genome might be higher expressed  
156 in larger cells. This could then lead to higher protein amounts, potentially also including the proteins  
157 limiting for mtDNA maintenance. We therefore asked whether the expression of factors known to be  
158 necessary for mtDNA maintenance indeed increases with cell volume.

159 As a first step to address this question, we determined the dependence of transcript concentration on cell  
160 volume for several nuclear encoded mitochondrial factors. To this end, we re-analyzed by RT-qPCR RNA  
161 samples of a *Whi5*-inducible strain grown on SCGE that we recently used to determine the concentration  
162 of histone transcripts as a function of cell volume (Claude et al., 2021). As we have shown previously,  
163 the transcript concentration of the control-gene *ACT1* is maintained nearly constant with cell volume. In  
164 contrast, the concentration of histone mRNA decreases in inverse proportion with cell volume to maintain  
165 constant histone amounts (Claude et al., 2021). Here, we find that the transcript concentration of all  
166 nuclear encoded mitochondrial factors analyzed only slightly decreases with cell volume, resulting in  
167 significantly increased transcript amounts in large cells (Fig. 3a). To validate this finding, we could make  
168 use of two previously published datasets (Swaffer et al., 2021a) that measured the cell-size dependence  
169 of transcripts 1.) in budded cells sorted by cell size (total protein content) using flow cytometry, and 2.)  
170 during the first cell cycle of cells released from G1 arrests of varying time, and thus of cells with different  
171 volumes. Again, we find that similar to most transcripts, including those of RNA Polymerase II subunits

172 and *ACT1*, the transcripts of factors involved in mtDNA maintenance are kept at largely cell-size  
173 independent concentrations (Fig. 3b).

174 As a next step, we asked whether the increasing transcript amount indeed leads to larger amounts of the  
175 corresponding proteins. Again, we could make use of an analysis performed by Swaffer et al. (Swaffer et  
176 al., 2021a): using previously published flow-cytometry data on a collection of strains in which each open  
177 reading frame (where possible) was tagged with GFP (Parts et al., 2014), the dependence of protein  
178 amounts on cell size was analyzed. While many of the mtDNA maintenance factors were excluded from  
179 this data-set for technical reasons, in particular due to low expression levels, all mtDNA factors included  
180 (*Abf2*, *Mhr1*, *Pim1*, *Rpo41*) showed an increase of protein amount with cell size similar or stronger than  
181 the average of all measured proteins (Fig. 3c).

182 To further confirm that the amount of proteins necessary for mtDNA maintenance increases with cell  
183 volume, we constructed haploid strains in which we endogenously tagged the mtDNA polymerase *MIP1*  
184 as well as the mtDNA packaging factor *ABF2* (the budding yeast TFAM protein), respectively, with the  
185 fluorescent protein *mCitrine*. We ensured that the tagged proteins are functional by testing growth on  
186 SCGE and measuring mtDNA concentrations with qPCR (Supplementary Fig. 5). In the case of *Mip1*-  
187 *mCitrine*, we found that the strain with the tagged allele has increased amounts of mtDNA  
188 (Supplementary Fig. 5a), but still shows the typical increase of mtDNA copy number with cell volume.  
189 Thus, the mechanism ensuring the cell-volume dependence is still intact, suggesting that also the  
190 regulation of *Mip1* with cell volume is not dramatically impaired by the tag (Supplementary Fig. 5e). Using  
191 *mCitrine* fluorescence intensity as a proxy for protein amount, and side scatter as a measure for cell  
192 volume (Supplementary Fig. 6), we then determined the cell-volume-dependence of *Mip1* and *Abf2*  
193 protein amounts with flow cytometry. Consistent with the transcript measurements, we found that the  
194 amounts of both *Mip1*-*mCitrine* and *Abf2*-*mCitrine* strongly increase with cell volume (Fig. 3d-e).

195



## 196 **Mip1 and Abf2 are limiting for mtDNA maintenance**

197 Our results suggest that in larger cells, the proteins required for mtDNA replication and maintenance are  
198 present at higher numbers. If those proteins are limiting for mtDNA maintenance, meaning that a change  
199 in the protein abundance would cause a proportional change in the mtDNA copy number, this cell-volume-  
200 dependent increase in proteins could explain why larger cells have more mtDNA. To test if this is the  
201 case, and if so, which proteins are limiting, we created a series of hemizygous diploid strains, in each of  
202 which we deleted one allele of a gene involved in mtDNA maintenance (Contamine and Picard, 2000),  
203 including the mitochondrial DNA polymerase Mip1 (Stumpf et al., 2010), the DNA packaging protein Abf2  
204 (Zelenaya-Troitskaya et al., 1998), the ssDNA-binding protein Rim1 (Van Dyck et al., 1992), helicases  
205 (Crider et al., 2012; Muellner and Schmidt, 2020; Sedman et al., 2000), and proteins involved in DNA  
206 recombination (Ling and Yoshida, 2020). Because most budding yeast genes do not exhibit dosage  
207 compensation at the transcript (Torres et al., 2016) or protein level (Springer et al., 2010), hemizygous  
208 diploids will in most cases show a 50% decrease of the corresponding transcript and protein. Should this  
209 protein then be perfectly limiting for mtDNA maintenance, we expect a 50% reduction of the mtDNA copy  
210 number (Fig. 4a).

211 For each hemizygous strain, we performed qPCR experiments to measure the ratio of mtDNA to nuclear  
212 DNA copies. We also measured cell volume, but did not find any major changes caused by the  
213 hemizygous deletions (which would cause changes in mtDNA copy number) (Supplementary Fig. 7a).  
214 As shown in Fig. 4b, we found that reducing the gene dosage of *MIP1* and *ABF2* had the strongest effect  
215 on mtDNA copy number. However, as validated by additional independent experiments (Fig. 4c), even  
216 diploids hemizygous for *MIP1* or *ABF2* showed only a reduction to 79% and 69%, respectively, of the  
217 mtDNA concentration. To rule out the possibility that we do not see a reduction of mtDNA to 50% because  
218 *MIP1* and *ABF2* exhibit dosage compensation, we measured the expression level. For both hemizygotes,  
219 we did not observe clear evidence for dosage compensation (Supplementary Fig. 7b-d) – consistent with  
220 a previous study that showed the absence of dosage compensation on the protein level in a strain

221 heterozygous for fluorescently tagged Abf2 (Springer et al., 2010). Taken together, our results suggest  
222 that while mtDNA copy number is sensitive to the concentration of several proteins, none of the proteins  
223 we tested is perfectly limiting.

224

## 225 **Mathematical model explains coordination of mtDNA with cell volume**

226 Since we found that the cell-volume dependent increase of mtDNA cannot be trivially explained by a  
227 proportional increase of a single perfectly limiting factor, we decided to use mathematical modelling to  
228 obtain a better understanding of how several partially limiting components of the mtDNA maintenance  
229 machinery could contribute to mtDNA homeostasis. Because *MIP1* and *ABF2* hemizygotes showed the  
230 strongest reduction of mtDNA copy number, we decided to build a simple model focusing on the role of  
231 only these two proteins, neglecting the smaller contribution as limiting factors of other proteins.

232 In essence, and ignoring cell-to-cell variability, mtDNA copy number depends on the rates of mtDNA  
233 replication, degradation, and dilution by cell growth. While *Mip1* might also affect mtDNA stability via its  
234 reported exonuclease activity (Viikov et al., 2012), we aimed to build a minimal model to understand the  
235 underlying principles, and therefore decided to only consider its obvious role in replication. Similarly, also  
236 *Abf2* might be important for both replication and stability of mtDNA. If *abf2* deletion mutants are grown  
237 on fermentable media, they rapidly lose mtDNA. Nevertheless, *abf2Δ* cells can be grown on non-  
238 fermentable media, where they can maintain a pool of mtDNA over many generations (Diffley and  
239 Stillman, 1991), demonstrating that *Abf2* is not essential for mtDNA replication. Instead, the compaction  
240 of mtDNA mediated by *Abf2* seems to be important for mtDNA stability, suggesting that including this  
241 function of *Abf2* in the model could be sufficient to understand the fundamental regulatory principles.

242 In the model, we account for these considerations by describing replication as a process that occurs at a  
243 rate that is determined by the concentrations of the mtDNA itself,  $n$ , as well as that of the mtDNA  
244 polymerase *Mip1*,  $m$ , with Michaelis-Menten-like kinetics  $\frac{dn}{dt} = k_R \frac{m}{K_1 + \frac{m}{n}}$  (Fig. 5a-b). Here,  $k_R$  and  $K_1$  are

245 constants describing the maximal rate of replication per mtDNA and the dissociation constant of *Mip1*  
246 and mtDNA, respectively.

247 Similarly, we model mtDNA degradation as a process inhibited by increasing concentrations of Abf2,  $a$ ,  
248 such that  $\frac{dn}{dt} = -k_D \frac{n}{K_2 + \frac{a}{n}}$ , where  $k_D$  and  $K_2$  are again constants (Fig. 5a,c). Accounting for cell growth by

249 assuming dilution of mtDNA according to exponential growth with a doubling time  $T$ , we can then balance  
250 replication, degradation, and dilution to obtain  $\frac{dn}{dt} = k_R \frac{m}{K_1 + \frac{m}{n}} - k_D \frac{n}{K_2 + \frac{a}{n}} - \frac{n \ln 2}{T}$  (Fig. 5a). Assuming steady-

251 state,  $\frac{dn}{dt} = 0$ , we then obtained an equation directly linking the concentration of mtDNA to that of *Mip1*  
252 and *Abf2*.

### 253 **Nuclear encoded mtDNA maintenance machinery can couple mtDNA amount to cell volume**

254 One direct implication of this result is that if the amounts of *Mip1* and *Abf2* increase in direct proportion  
255 to cell volume, thereby maintaining constant concentrations  $a$  and  $m$ , the steady state solution for  $n$ , *i.e.*  
256 the concentration of mtDNA, is also independent of cell volume. In other words, the mtDNA copy number  
257 increases in direct proportion to cell volume (Fig. 5a). Thus, our simple model explains how an increasing  
258 amount of mtDNA maintenance machinery in bigger cells can couple mtDNA copy number to cell volume.

259 Next, we asked whether our model also explains the reduction of mtDNA observed in diploids hemizygous  
260 for *MIP1* or *ABF2*. In the model, deletion of one of the alleles of *MIP1* and *ABF2* can be accounted for by  
261 reducing  $m$  or  $a$ , respectively, by a factor of 2. Solving the steady state model, we then found that the  
262 effect of the hemizygous deletions strongly depends on the exact parameters chosen: We can find  
263 parameters, for which both hemizygotes cause a reduction to about 70% of mtDNA, reflecting our  
264 experimental results (Fig. 5d). However, faster replication (increased  $k_R$ ) will shift the system to a regime  
265 where *MIP1* hemizygotes show almost a 50% reduction, and *ABF2* hemizygotes have nearly unchanged  
266 mtDNA amounts. In contrast, increasing the degradation rate  $k_D$  results in the opposite behavior. Thus,  
267 while our model can be consistent with our experimental findings, single hemizygote deletions are not

268 well-suited to test the model. However, we noticed that our model makes a prediction for a simultaneous  
269 manipulation of Mip1 and Abf2 concentrations: Independent of the parameters chosen, if  $m$  and  $a$  are  
270 changed by the same factor, also the concentration of mtDNA,  $n$ , follows proportionally (Fig. 5d).

271 To directly test this prediction, we constructed a strain hemizygous for both *MIP1* and *ABF2*. We verified  
272 with qPCR that in this double hemizygote, expression of *MIP1* and *ABF2* is reduced to 50%  
273 (Supplementary Fig. 7b-d). As predicted by the model, we find that in this strain also the concentration of  
274 mtDNA is reduced close to 50% (Fig. 6a). Since the model also predicts that the effect of the hemizygous  
275 deletions should be independent of cell volume, we then repeated the experiments with a *Whi5*-inducible  
276 strain. Consistent with the model, we found that both single- and double hemizygotes show mtDNA copy  
277 numbers that increase with cell volume, with similar relative reduction of mtDNA by the hemizygous  
278 deletions at all cell volumes (Fig. 6b).

279 Similar to a simultaneous reduction of Mip1 and Abf2 concentrations, our model also predicts that the  
280 mtDNA concentration should increase 2-fold if both Mip1 and Abf2 are 2-fold overexpressed. To test this  
281 hypothesis, we constructed haploid strains in which we endogenously integrated additional copies of the  
282 *MIP1* and/or *ABF2* genes (Fig. 6c), resulting in a 2-fold increase of *MIP1* and *ABF2* expression,  
283 respectively (Supplementary Fig. 8). Consistent with the effect of hemizygous deletions, we find that  
284 overexpression of either Mip1 or Abf2 results in a moderate increase of mtDNA concentration, and  
285 simultaneous overexpression of both has an additive effect (Fig. 6d). Again, repeating the experiment in  
286 a *Whi5*-inducible strain revealed that the proportional scaling of mtDNA amount with cell volume is  
287 maintained in each strain (Fig. 6e). Importantly, however, simultaneous 2-fold overexpression of Mip1  
288 and Abf2 only results in a 57% increase of mtDNA, which is less than the 2-fold increase predicted by  
289 our simple model. This suggests that upon overexpression of the most limiting factors for mtDNA  
290 maintenance (Mip1 and Abf2), other proteins, which are not included in our model, become limiting. Given  
291 our analysis of the expression of mtDNA maintenance factors (Fig. 3), it seems likely that also the amount  
292 of those additional factors increases in proportion to cell volume. In contrast to the selective

293 overexpression of only Abf2 and Mip1 we achieved through the additional gene copies, a 2-fold increase  
294 of cell volume would then still maintain Mip1 and Abf2 as major limiting factors, coupling mtDNA copy  
295 number to cell volume.

296

## 297 **Discussion**

298 In summary, we find that in budding yeast, mtDNA copy number is tightly coupled to cell volume, both in  
299 arrested cells growing in G1 and in asynchronously cycling cell populations. This is consistent with early  
300 work showing that mtDNA amount per cell increases during a G1 arrest (Petes and Fangman, 1973;  
301 Conrad and Newlon, 1982) and with the cell volume of stationary cells (Lee and Johnson, 1977). Because  
302 the coupling of mtDNA copy number to cell volume can maintain constant mtDNA concentrations  
303 independent of cell cycle stage, it provides an elegant mechanism for cells to maintain mtDNA  
304 homeostasis during cell growth, without requiring a coordination of mtDNA replication with the cell cycle.  
305 Interestingly, this strategy for DNA maintenance is opposite to that implemented by eukaryotes to  
306 maintain nuclear DNA, where DNA replication is strictly coupled to cell cycle progression but not directly  
307 linked to cell volume.

308 Based on our experiments and theoretical considerations, we propose a molecular mechanism that can  
309 quantitatively explain the increase of mtDNA amount with cell volume: mtDNA concentration is  
310 determined by the rates of replication, degradation and dilution by cell growth. Both replication and  
311 mtDNA stability can depend on mtDNA maintenance factors in a dose-dependent manner. Larger cells  
312 have overall more proteins, and also have a higher amount of mtDNA replication and maintenance  
313 factors. As a consequence, larger cells can maintain a higher mtDNA copy number (Fig. 7).

314 A single perfectly limiting component of the mtDNA maintenance machinery could directly lead to mtDNA  
315 amounts increasing in proportion to cell volume; for example, if larger cells had proportionally more  
316 mtDNA polymerase, and mtDNA replication rate increased in proportion to polymerase number.

317 However, our experiments suggest that no single protein is perfectly limiting (such that a doubling of  
318 protein concentration would lead to a doubling of mtDNA copy number). Instead, we identified two  
319 partially limiting factors, Mip1 and Abf2. To obtain a conceptual understanding of how several partially  
320 limiting factors, each of which is nuclear encoded and increasing in amount with cell volume, affect  
321 mtDNA numbers, we built a minimal mathematical model describing the contribution of mtDNA  
322 replication, degradation and dilution by growth. In the model, replication and degradation are promoted  
323 and prevented, respectively, by the most limiting factors Mip1 and Abf2. We find that even in a situation  
324 where neither Abf2 nor Mip1 are perfectly limiting, they synergistically cause an increase in mtDNA  
325 amount proportional to cell volume, thus maintaining constant concentrations. The model correctly  
326 predicts the ~50% decrease of mtDNA amount observed in diploids hemizygous for *MIP1* and *ABF2*.  
327 This suggests that in the situation where the most limiting factors Mip1 and Abf2 are both reduced below  
328 wild-type levels, all other factors whose concentration is not decreased are present in excess and thus  
329 have only a weak additional limiting contribution to mtDNA maintenance. By contrast, upon 2-fold  
330 overexpression of Mip1 and Abf2, we observe a stronger deviation from the simple model, which is  
331 consistent with other factors becoming partially limiting. At this point, we do not think it is helpful to extend  
332 our simple model to many additional factors because the exact molecular mechanisms of their  
333 contribution, including rate constants, are not known. However, it seems likely that adding also additional  
334 gene copies of the other limiting factors will result in a further increase of mtDNA concentration, eventually  
335 reaching a 2-fold increase. Since increasing cell volume likely causes an increasing abundance of all  
336 limiting factors, their combined effect is needed to fully explain the coordination of mtDNA amount and  
337 cell volume.

338 Importantly, while our work identifies a mechanism that couples mtDNA amount to cell volume, additional  
339 mechanisms can modulate mtDNA homeostasis. For example, additional mechanisms may be  
340 responsible to achieve adaptation to changing environments, such as the reduction of mtDNA copy  
341 number we observed for cell grown on fermentable compared to non-fermentable media. Within the

342 framework of the model, this can be achieved by regulating the concentration of limiting factors, but also  
343 by changing any of the rate constants. For example, Mrx6 was proposed to modulate mtDNA  
344 concentration through its role in degradation of factors involved in mtDNA replication (Göke et al., 2020).  
345 Moreover, while our proposed mechanism achieves mtDNA homeostasis without cell-cycle-dependent  
346 regulation, and we observe the increase of mtDNA amount with cell volume both in G1-arrested and in  
347 asynchronous cell populations, we cannot exclude modest cell-cycle-modulation. In this context it is  
348 noteworthy that in parasitic kinetoplastids such as *T. brucei* (Woodward and Gull, 1990), mtDNA  
349 replication is strongly coupled to the cell cycle, suggesting that also other organisms could employ cell  
350 cycle regulation as an additional level of regulation. In fact, in budding yeast both *MIP1* and *ABF2*  
351 expression exhibit weak cell-cycle-dependence (Santos et al., 2015), which would propagate to mtDNA  
352 amounts in our model.

353 Our study reveals that in addition to mitochondrial network volume (Rafelski et al., 2012), also mtDNA  
354 amount increases with cell volume. In addition, we also did not observe major changes of mitochondrial  
355 diameter and ultrastructure. However, even in the absence of major structural changes, mitochondrial  
356 function, including respiratory activity, might be modulated by cell size. For example, previous work in  
357 mammalian cells found that while mitochondrial mass increases with cell volume, mitochondrial function  
358 is optimal at intermediate cell volumes (Miettinen et al., 2014; Miettinen and Björklund, 2016). Similarly,  
359 molecular reorganization could modulate mitochondrial function in yeast such that optimal function is  
360 achieved at intermediate volumes.

361 In essence, the mechanism we propose here for mtDNA homeostasis in budding yeast only requires that  
362 the limiting components of the mtDNA maintenance machinery increase in abundance with cell volume.  
363 One key feature of this mechanism is that it is robust towards perturbations and fluctuations in mtDNA  
364 concentration. Since steady state concentrations of mtDNA are set by the concentrations of the nuclear  
365 encoded limiting factors, which are themselves independent of mtDNA concentration, cells with excess  
366 or low levels of mtDNA will regress back to the stable steady state without a need for an active feedback

367 mechanism. Indeed, such passive regression to the mean has been observed for the nucleoid number  
368 in fission yeast (Jajoo et al., 2016).

369 We anticipate that mtDNA homeostasis achieved through limiting nuclear encoded machinery is a  
370 regulatory principle that is conserved across eukaryotes. However, the identity of the most limiting factors  
371 might vary between organisms. For example, it has been shown that in animals, the Abf2 homolog TFAM  
372 (Larsson et al., 1998; Matsushima et al., 2003; Ekstrand et al., 2004) as well as the mitochondrial helicase  
373 TWINKLE (Tynismaa et al., 2004) have a strong dose-dependent effect on mtDNA copy number. Further  
374 supporting our hypothesis, a recent study revealed that many mitochondrial proteins, including TFAM,  
375 increase in amount with increasing volume of human epithelial cells (Lanz et al., 2021). More generally,  
376 the increase of global protein amounts with increasing cell size due to increased biosynthetic capacity is  
377 widely conserved across eukaryotes. Thus, limiting nuclear encoded genes provide a robust mechanism  
378 to achieve mtDNA homeostasis in growing cells.

379

## 380 **Methods**

### 381 Yeast strains

382 All yeast strains used in this work are derived from W303 and listed in Supplementary Table 2.  
383 Construction of yeast strains was performed with standard methods. Transformants were verified by  
384 control PCRs and sequencing.

385 Microscopy strains (haploid, diploid,  $\rho^0$ ) were generated from parental strains containing LacO-arrays in  
386 mtDNA (yCO380, yCO381) (Osman et al., 2015). Endogenous *WHI5* was deleted in yCO380 and  $\beta$ -  
387 estradiol-inducible *WHI5* was integrated (KSE113-1) followed by endogenous integration of a plasmid  
388 carrying the  $\beta$ -estradiol transcription factor (FRP880) (Ottoz et al., 2014), resulting in strain ASY11-2B.  
389 Next, the plasmid ASE001-5 containing *mKate2* and *LacI* tagged two copies of *mNeon* was integrated



390 into the HO-locus to obtain strain ASY13-1. To generate the diploid strain ASY15-1, yCO381 was  
391 transformed with ASE001-5 and crossed with ASY11-2B.

### 392 Yeast culturing

393 All strains were grown at 30°C in a shaking incubator at 250 rpm (Infors, Ecotron).

394 Prior to growing cells on non-fermentable medium (synthetic complete media containing 2% glycerol and  
395 1% ethanol, SCGE), strains were grown for at least 6 h on YPD. Then, cells were washed with SCGE  
396 and transferred into SCGE. Cultures were grown for about 24 h in exponential phase when directly used  
397 for experiments, or grown for at least 12 h before adding  $\beta$ -estradiol to Whi5-inducible strains. To tune  
398 Whi5 concentration in Whi5-inducible strains, cells were grown for another 24 h in the presence of the  
399 respective  $\beta$ -estradiol concentration. For haploid strains, concentrations of 0 nM, 10 nM, and 30 nM, and  
400 for diploids 0 nM, 15 nM and 60 nM  $\beta$ -estradiol were used.

401 When using fermentable medium, cells were directly inoculated in synthetic complete media containing  
402 2% dextrose (SCD) and grown for at least 12 h prior addition of  $\beta$ -estradiol. For both haploid and diploid  
403 strains, concentrations of 0 nM, 15 nM, 60 nM and 150 nM  $\beta$ -estradiol were added, and cells grown for  
404 additional 24 h.

405 For the G1-arrest (Fig. 1c), a *cln1/2/3* deletion strain with Cln1 expressed from a  $\beta$ -estradiol-inducible  
406 promoter was used (Ewald et al., 2016). Prior G1-arrest, cells were grown at least 6 h on YPD with 30 nM  
407  $\beta$ -estradiol, transferred into SCGE with 30 nM  $\beta$ -estradiol and grown for about 24 h. For fermentable  
408 conditions, cells were directly inoculated in SCD medium with 60 nM  $\beta$ -estradiol and grown for 24 h. To  
409 initiate the G1 arrest, cells were washed with the respective medium without hormone, and cultures were  
410 then harvested every hour (SCGE 0-8 h; SCD 0-6 h).

411 Steady-state exponential growth conditions were obtained by regularly measuring optical densities using  
412 a spectrophotometer (Perkin Elmer, Lambda Bio+) and ensuring  $OD_{600} < 1$  through appropriate dilutions.

413 To determine mean cell volumes of cell populations, cell volume distributions were measured using a  
414 Coulter counter (Beckman Coulter, Z2 Particle Counter) after sonication. Due to technical limitations of  
415 the measurable ranges, samples were measure twice with two different settings (Range 1: 10 fL - 328 fL,  
416 gain: 256, current: 0.707 ma; Range 2: 328 fL – 1856 fL, gain: 256, current: 0.125 ma). We then used  
417 both measurements to calculate a mean volume within the combined cell volume range.

#### 418 mtDNA copy number measurements

419 Cells were cultivated in 50 ml of the respective medium with corresponding  $\beta$ -estradiol concentrations.  
420 Prior to harvesting, cell volume distributions and optical density were measured. Cell cultures were spun  
421 at 4000 rpm and pellets were washed with 1 ml double-distilled water.

422 gDNA was extracted by phenol-chloroform-isoamyl alcohol (PCI) extraction. More precisely, cells were  
423 mechanically disrupted by vortexing at 3000 oscillations per minute (Mini-BeadBeater 24, 230V, BioSpec  
424 Products) with glass beads in 200  $\mu$ l DNA extraction buffer pH 8.0 (2% TritonX100, 1% SDS, 100 mM  
425 NaCl, 10 mM TRIS, 1 mM EDTA) and 200  $\mu$ l PCI. After centrifugation at 13,000 rpm, the aqueous phase  
426 was taken to precipitate gDNA with 500  $\mu$ l 100% EtOH, centrifugation was repeated and the pellet was  
427 then washed with 800  $\mu$ l 70% EtOH.

428 To remove RNA residues, the pellet was solved in nuclease-free water, treated with 1 mg/ml RNase A  
429 (DNase-free) and incubated for 30 min at 37°C. Subsequently, DNA extraction buffer and PCI were  
430 added and extraction steps were repeated. DNA concentrations were determined with a  
431 spectrophotometer (Thermo Fisher Scientific, NanoDrop 2000) through measurements at 260 nm. For  
432 qPCRs, 1 ng DNA was used.

433 Next, quantitative PCR was performed on a LightCycler 480 Multiwell Plate 96 (Roche). For amplification,  
434 a DNA-binding fluorescent dye (BioRad, SsoAdvanced Universal SYBR Green Supermix) and specific  
435 primers for nuclear DNA (nDNA) genes *ACT1*, *MIP1* and *MRX6* and mtDNA genes *COX2* and *COX3*  
436 (Supplementary Table 3) were used. For strains in which *MIP1* gene copy was manipulated, *MIP1* primers

437 were omitted from the analysis. Note that the initial denaturation time was set to 10 min. Each sample  
438 was measured in technical triplicates. For further analysis, mean Cq-values of the technical replicates  
439 were used. Single technical replicates were excluded from the analysis when the standard deviation was  
440 higher than 0.5.

441 To correct for differences in primer efficiencies and enable absolute measurements of DNA  
442 concentrations, a calibration standard was obtained by constructing a single PCR product containing all  
443 amplified sequences. A standard dilution series with defined input concentrations (1 pg/μl - 10<sup>-4</sup> pg/μl)  
444 was then performed to obtain a standard curve for each primer pair. A linear fit to these calibration curves  
445 was finally used to calculate concentrations from qPCR measurements (Supplementary Fig. 9).

446 Concentrations of each gene were calculated, and nDNA concentrations (based on *ACT1*, *MIP1*, *MRX6*)  
447 and mtDNA concentrations (*COX2*, *COX3*) were pooled by calculating the mean, respectively. mtDNA  
448 concentrations were then normalized on nDNA, to obtain the relative mtDNA copy number per nDNA. By  
449 performing bud counts, a budding index (percentage of budded cells) was determined for each cell  
450 population, and used to calculate the average nDNA amount per cell:  $\frac{nDNA(haploids)}{cell} =$

451  $\frac{(\% buds*2)+(\% no-buds*1)}{100}$  or  $\frac{nDNA(diploids)}{cell} = \frac{(\% buds*4)+(\% no-buds*2)}{100}$ . Multiplication with mtDNA copies per

452 nDNA then allowed us to determine the average mtDNA copy number per cell.

### 453 mRNA measurements

454 RNA samples in Fig. 3a were taken from experiments performed in the study of Claude et al. (Claude et  
455 al., 2021), Fig. 2 b-c. Briefly, cells were cultivated in 25 ml of the respective media and grown as described  
456 above. RNA was extracted by a hot acidic phenol (Sigma-Aldrich) and chloroform (Thermo Fisher  
457 Scientific) extraction. RNA extractions in Supplementary Fig. 1, 5, 7, 8 were performed with the YeaStar  
458 RNA Kit (Zymo Research) following the instructions of the given protocol. DNA contaminations were  
459 removed by a DNA digestion step using DNaseI (Life Technologies). cDNA was synthesized by using  
460 1000 ng total RNA, random primers and following the protocol of the high-capacity cDNA reverse-

461 transcription kit (Thermo Fisher Scientific). mRNA expression levels of *MIP1*, *ABF2*, *PIM1*, *MTF1*, *RPO41*  
462 and *MRX6* were measured by qPCR using the fluorescent dye SybrGreen for detection. 2  $\mu$ l of a 1:10  
463 dilution of cDNA was used, except for the ribosomal RNA *RDN18*, for which 2  $\mu$ l of a 1:200 dilution was  
464 used. Each sample was measured in triplicates and concentrations were calculated after normalization  
465 on *RDN18*.

#### 466 Analysis of transcript and protein cell-size-dependence based on Swaffer et al.

467 To compare the cell-size-dependence of the transcripts of mtDNA maintenance factors (*ABF2*, *HMI1*,  
468 *MGM101*, *MHR1*, *MIP1*, *MRX6*, *MTF1*, *PIF1*, *PIM1*, *RAD53*, *RIM1*, *RPO41*, *RRM3*) with that of scaling  
469 control genes (*ACT1* and the RNA polymerase II subunits *RPB2*, *RPB3*, *RPB4*, *RPB5*, *RPB7*, *RPB8*,  
470 *RPB9*, *RPB10*, *RPB11*, *RPO21*) and the sub-scaling histones (*HHF1*, *HHF2*, *HHO1*, *HHT1*, *HTA1*, *HTA2*,  
471 *HTB1*, *HTB2*, *HTZ1*), we analyzed two data sets published by Swaffer et al. (Swaffer et al., 2021a). For  
472 the first data set, budded cells were sorted into four different size bins using a total protein stain as a  
473 measure for cell size and then analyzed with RNA sequencing. We compared the ratio (mean of two  
474 independent replicates) between the relative expression levels in the largest and smallest cells. For the  
475 second data set, cells were elutriated and arrested in G1 for different amounts of time before synchronous  
476 release, resulting in different cell volumes at the time of cell cycle entry. The temporal evolution of the  
477 transcriptome during cell cycle progression was then analyzed with RNA sequencing. The relative  
478 expression throughout the cell cycle was then calculated as the Area Under the Curve (AUC) of the  
479 expression level time course (after applying a spline). Again, we compared the ratio between the largest  
480 and smallest cells (mean of two independent replicates). Based on the combined analysis of both  
481 datasets, all mtDNA factors we analyzed were classified as 'scaling' by Swaffer et al. In the first data set  
482 (but not the second) *RAD53* showed a strongly increased expression in big cells, which we attributed to  
483 its strong cell-cycle-dependence. We therefore excluded *RAD53* from further analysis.

484 Of the mtDNA maintenance factors described above, *Abf2*, *Mhr1*, *Pim1* and *Mhr1* are included in the  
485 analysis of the dependence of protein amount on cell volume by Swaffer et al. based on flow-cytometry

486 measurement on strains carrying GFP-tagged alleles of the respective proteins performed by Parts et al.  
487 (Parts et al., 2014). Briefly, the normalized slope of GFP intensity as a function side scatter was used to  
488 estimate the cell-volume-dependence of the protein amount. Proteins maintained at a perfectly constant  
489 amount would be expected to exhibit a slope of 0, while proteins maintained at a constant concentration  
490 would exhibit a slope of 1. Parts et al. performed two independent biological replicates, which we  
491 analyzed separately.

#### 492 Microscopy

493 For imaging, coverslips ( $\mu$ -Slide 8 Well, ibi-Treat, ibidi) were covered with 200  $\mu$ l Concanavalin A (ConA,  
494 1mg/ml in H<sub>2</sub>O) and incubated for 5-10 min. The wells were then washed twice with water and left to air  
495 dry.

496 Cells were cultivated as described in 5 ml medium. 1 ml of the culture was spun at 13.000 rpm and  
497 washed twice with 1 ml medium. Depending on the OD, the pellet was dissolved in 200  $\mu$ l - 500  $\mu$ l of the  
498 respective medium and 200  $\mu$ l were transferred to the ConA covered well. The cells were then allowed  
499 to settle down for about 5 min, before the supernatant was removed and the wells were washed twice  
500 with medium. 200  $\mu$ l medium were used to cover the wells.

501 Live-cell fluorescence microscopy experiments were performed on a Zeiss LSM 800 microscope  
502 (software: Zen 2.3, blue edition) equipped with a scanning disk confocal and an axiocam 506 camera,  
503 using the confocal mode. Images were taken using a 63x /1.4 Oil DIC objective. Z-stacks were acquired  
504 over 15.05  $\mu$ m in 0.35  $\mu$ m increments. mKate2 was imaged with an excitation wavelength of 561 nm, and  
505 detecting emission between 610-700 nm. mNeon was excited at 488 nm and detected between 410-  
506 546 nm. Bright field images were taken using the transmitted light detector (T-PMT).

#### 507 Cell segmentation

508 Cell segmentation was performed using Cellpose v0.6 (Stringer et al., 2021) with the 'cell diameter'  
509 parameter set to 50 pixels, 'flow threshold' set to 0.4, and 'cell probability threshold' set to 0. Cell-ACDC

510 (Padovani et al., 2021) was used to manually correct segmentation, annotate buds to their corresponding  
511 mother cells, and calculate cell volume.

### 512 Nucleoids counting and mitochondrial network volume calculation

513 To count the number of nucleoids and compute the mitochondrial network volume from confocal 3D z-  
514 stack images, we developed a custom routine written in Python.

515 The analysis steps are the following: 1) Application of a 3D gaussian filter with a small sigma (0.75 voxel)  
516 of both the nucleoids and mitochondria signals; 2) instance segmentation of the mitochondria signal using  
517 automatic Li thresholding (Li and Tam, 1998) (*threshold\_li* function from the library *scikit-image* (van der  
518 Walt et al., 2014)); 3) normalization of the mitochondria signal using the median of the voxel intensities  
519 classified as mitochondria in step 2; 4) 3D local maxima detection (peaks) in the nucleoids signal using  
520 the *peak\_local\_max* function from the library *scikit-image*; 5) discarding of peaks that are below a  
521 threshold value determined with the automatic Li thresholding algorithm; 6) discarding of overlapping  
522 peaks: if two or more peaks are within a resolution limited volume only the peak with highest intensity is  
523 retained. The resolution limited volume is determined as a spheroid with  $x$  and  $y$  radii equal to the Abbe  
524 diffraction limit and  $z$  radius equal to 1  $\mu\text{m}$ . With a numerical aperture of 1.4 and mNeon emission  
525 wavelength of about 509 nm, the resolution limited volume has  $x = y = 0.222 \mu\text{m}$  radius; 7) the remaining  
526 peaks undergo a subsequent iterative filtering routine: a) each voxel classified as mitochondria in step 2  
527 is further classified as inside or outside of the nucleoids. A voxel is outside of the nucleoid if it is not within  
528 the resolution limited volume centred at the peak coordinates; b) the nucleoids signal is normalized by  
529 the mean of the voxel intensities classified as outside of the nucleoids (step 7a); c) the normalized  
530 intensity distribution of the voxels inside each nucleoid volume is compared to the same voxels from the  
531 mitochondria signal. The comparison is performed with a Welch's t-test and if the  $p$ -value is above 0.025  
532 or the t-statistic is negative (*i.e.*, mitochondria signal higher than nucleoid's signal) the peak is discarded;  
533 d) steps a) to c) are repeated until the number of nucleoids stops changing. The assumption of comparing

534 the nucleoids signal to the mitochondria signal is that a peak is a valid nucleoid only if it has an intensity  
535 significantly higher than the corresponding mitochondria signal (after normalization).

536 The resulting peaks are considered valid nucleoids and are therefore counted. The mitochondrial network  
537 volume is computed as the sum of the voxels classified as mitochondria in step 2. Note that due to the  
538 optical resolution limit, the width of the network is not measured accurately with confocal microscopy and  
539 the obtained mitochondria network volume is therefore not an absolute measure for the physical volume  
540 of the mitochondria.

#### 541 Electron microscopy

542 For cell volume quantification, a sample was taken from each culture before the cells were prepared for  
543 electron microscopy. These samples were analyzed by light microscopy and DIC images of living cells  
544 were taken using a Zeiss Axiophot microscope equipped with a Plan-Neofluar 100x/1.30 Oil objective  
545 (Carl Zeiss Lichtmikroskopie, Göttingen, Germany) and a Leica DFC360 FX camera operated with the  
546 Leica LAS AF software version 2.2.1 (Leica Microsystems, Wetzlar, Germany). Cell segmentation and  
547 volume estimation was performed using Cell-ACDC (Padovani et al., 2021) as described above.

548 Fixation of yeast cells for electron microscopy with glutaraldehyde and potassium permanganate was  
549 performed as described in (Perkins and McCaffery, 2007) with minor changes: Cells were initially fixed  
550 with 3% glutaraldehyde, 0.1 M cacodylic acid, 1 mM CaCl<sub>2</sub>, pH 7.2 and subsequently washed with 0.1 M  
551 cacodylic acid, 1 mM CaCl<sub>2</sub>, pH 7.2. Treatment with potassium permanganate was performed before  
552 embedding in agar. After overnight staining with 2% uranyl acetate at room temperature, dehydration of  
553 chemically fixed yeast cells with ethanol and propylene oxide, Epon infiltration, and contrast  
554 enhancement of ultrathin sections were essentially performed as described in (Unger et al., 2017) with  
555 the following modifications: All dehydration steps were performed at 4 °C, Epon infiltration was performed  
556 at room temperature, and contrast enhancement of ultrathin sections was performed for 15 minutes with  
557 2% uranyl acetate and for 3 minutes with lead citrate. Electron micrographs were taken using a JEOL

558 JEM-1400 Plus transmission electron microscope operated at 80 kV, a 3296x2472 pixels JEOL Ruby  
559 CCD camera, and the TEM Center software, either Ver.1.7.12.1984 or Ver.1.7.19.2439 (JEOL, Tokyo,  
560 Japan). For each strain, condition, and replicate, as an estimate of mitochondrial diameter the widest  
561 point of the shorter edge of 100 mitochondria was measured from electron micrographs using Fiji  
562 (Schindelin et al., 2012).

### 563 Flow cytometry

564 Wild-type cells in which Mip1 and Abf2, respectively, were endogenously tagged with mCitrine were  
565 analyzed with flow cytometry to determine the dependence of Mip1 and Abf2 protein amounts on cell  
566 volume.

567 Cells were cultured as described above. After 16-20 h of growth on SCGE, cultures were diluted, split  
568 into 3 technical replicates and for control measurements shown in Supplementary Fig. 6a-b,  $\beta$ -estradiol  
569 was added. Optical density was measured with a spectrophotometer (ThermoFisher Scientific,  
570 NanoDrop2000) and only cultures with an  $OD_{600} < 0.9$  were included in the flow cytometry measurements.  
571 Cultures were kept on ice until measurement. After sonification for 10 sec mean cell volume of each  
572 culture was determined using a Coulter counter. The Flow Cytometry measurement was performed on a  
573 CytoFlex S Flow Cytometer (Beckman Coulter) and the parameters FSC-A, SSC-A and total fluorescence  
574 intensity using the FITC channel (excitation at 488 nm and detection with a 525/40 nm filter) were  
575 recorded. Cells were analyzed at a slow flow rate (10  $\mu$ L/min) and data were collected from 50.000 events  
576 per sample. Through a standard gating strategy (Supplementary Fig. 6d), cell debris, particles and  
577 doublets were excluded from the analysis. Identical settings were used for all measurements. To correct  
578 for the autofluorescence of yeast cells, the parent strain without mCitrine tag was measured.

579 After confirming that differences between technical replicates were negligible, the 3 replicates measured  
580 on one day were pooled, and binned according to SSC-A, which is a good proxy for cell volume  
581 (Supplementary Fig. 6). To correct for autofluorescence, for each bin the mean signal of the



582 autofluorescence control was subtracted from the mean signal of the fluorescent strain in the same bin.  
583 This analysis was repeated for data obtained on a different day (3 technical replicates each). Background-  
584 corrected signals obtained on each day were then averaged. For each bin, the maximum (minimum) of  
585 the two signals plus (minus) the standard error associated with the measurement of the fluorescent strain  
586 was used to obtain an estimate of the experimental error.

### 587 Model

588 To better understand the effect of limiting mtDNA maintenance machinery on cell-volume-dependent  
589 mtDNA concentration,  $n$ , we built a minimal mathematical model, neglecting cell-to-cell variability and  
590 any potential contributions of asymmetric mtDNA inheritance between mother cells and their buds. We  
591 assumed that the rate of mtDNA replication is given by the concentrations of mtDNA polymerase Mip1,  
592  $m$ , as well as the mtDNA concentration such that the synthesis rate can be described by Michaelis Menten  
593 like kinetics,  $\frac{dn}{dt} = k_R \frac{m}{K_1 + \frac{m}{n}}$ . In the limit of saturating Mip1 concentrations, the synthesis rate then  
594 approaches the constant  $k_R$  multiplied by the concentration of mtDNA. At low Mip1 concentrations,  
595 replication is limited by the polymerase Mip1 and thus the synthesis rate increases in direct proportion  
596 with  $m$ .  $K_1$  describes the dissociation constant of Mip1 and mtDNA, respectively. In addition, we assume  
597 that in the absence of Abf2, each mtDNA molecule is degraded with a rate  $\frac{k_D}{K_2}$ , where  $k_D$  and  $K_2$  are again  
598 constants. Increasing concentrations of Abf2,  $a$ , then stoichiometrically protect mtDNA from degradation,  
599 such that the total rate of mtDNA degradation can be described by  $\frac{dn}{dt} = -k_D \frac{n}{K_2 + \frac{a}{n}}$ .  
600 Finally, we account for the fact that mtDNA is diluted by cell growth by assuming exponential growth with  
601 a doubling time  $T$ . Combining the contributions of replication, degradation, and dilution, we then find that

$$602 \quad \frac{dn}{dt} = k_R \frac{m}{K_1 + \frac{m}{n}} - k_D \frac{n}{K_2 + \frac{a}{n}} - \frac{n \ln 2}{T}$$

603 In steady state, we can then assume that  $\frac{dn}{dt} = 0$ , so that

604

$$0 = k_R \frac{m}{K_1 + \frac{m}{n}} - k_D \frac{n}{K_2 + \frac{a}{n}} - \frac{n \ln 2}{T}$$

605 From this equation it can be immediately seen that as long as the concentrations of Mip1 and Abf2 are  
606 constant, *i.e.* that the amounts of Mip1 and Abf2 increase in proportion to cell volume, also the  
607 concentration of mtDNA is maintained constant, *i.e.* the mtDNA copy number increases in proportion to  
608 cell volume.

609 To understand the impact of hemizygous *MIP1* and *ABF2* deletions, we then chose specific parameters  
610 ('wild-type':  $m = 5$ ,  $a = 100$ ,  $T = 150$ ,  $k_R = 0.01$  or  $0.1$ ,  $k_D = 1$  or  $10$ ,  $K_1 = 5$ ,  $K_2 = 100$ ), and solved the  
611 steady state equation using *Matlab*. Note that while the model is not meant to accurately reflect the  
612 quantitative details of budding yeast cells, the parameters are chosen such that the relative ratios of  $m$ ,  
613  $a$ , and  $n$  are roughly in the range expected from our measurements and previous estimates  
614 (Ghaemmaghami et al., 2003).

## 615 **Acknowledgements**

616 We thank Jennifer Ewald for sharing strains, Matthew Swaffer for help with data analysis, Benedikt  
617 Westermann and Stefan Geimer for help with electron microscopy, and Max Harner, Johanna Frickel,  
618 Simon Schrott, Aylin Göke, and members of the Institute of Functional Epigenetics for discussions. This  
619 work was funded by the Deutsche Forschungsgemeinschaft (DFG, German Research Foundation) -  
620 SCHM3031/6-1 and 459304237, by the Human Frontier Science Program (career development award to  
621 K.M.S.), by the Elitenetzwerk Bayern through the Biological Physics program (T.K.) and the Helmholtz  
622 Gesellschaft.

623

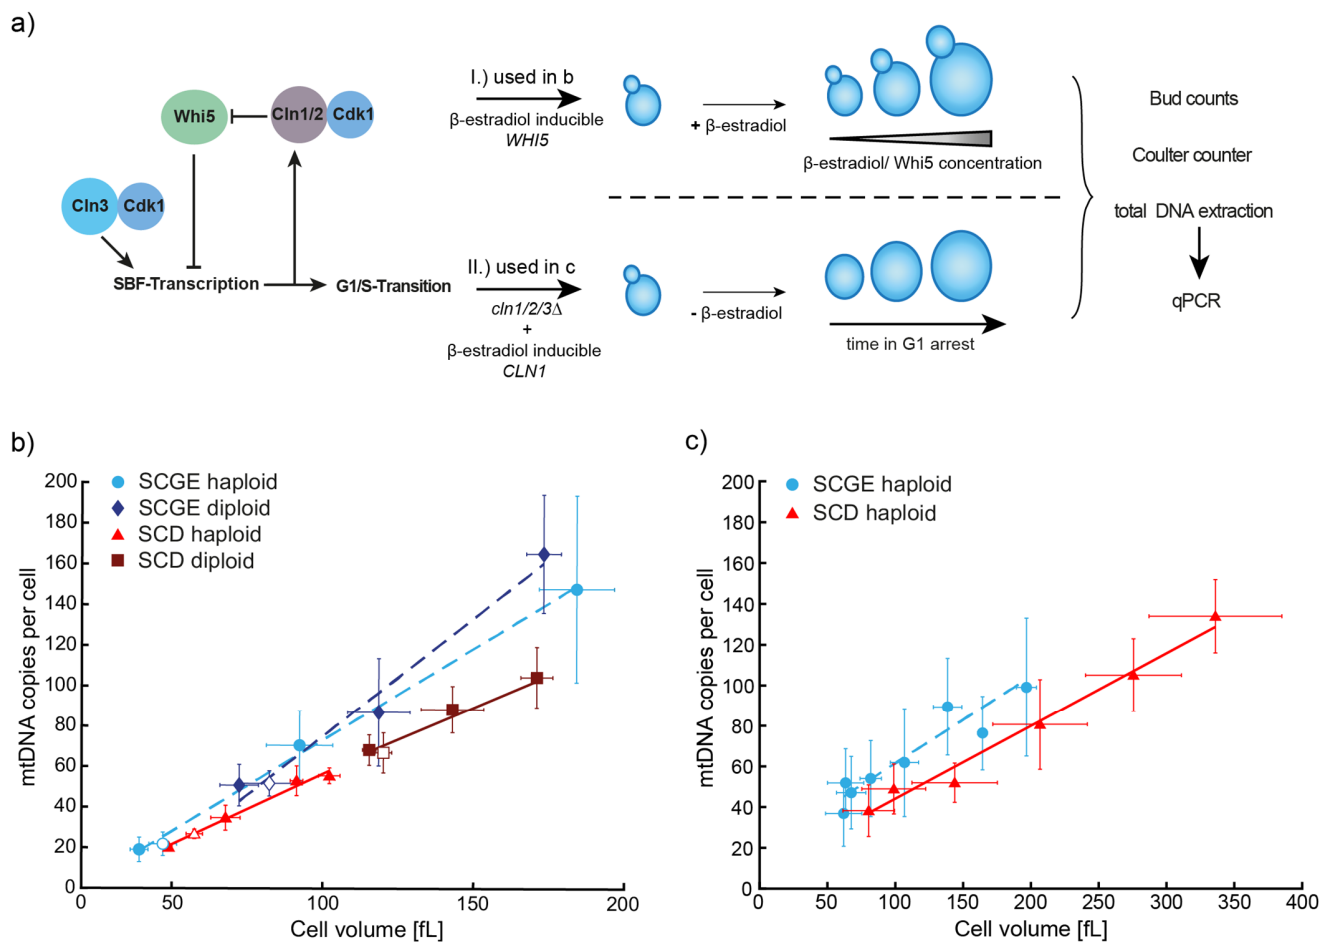

624

625 **Figure 1. mtDNA increases with cell volume and is modulated by nutrients.** a) Cell volume was  
 626 manipulated using two different genetic approaches. I.) *Whi5* concentration was controlled by a  $\beta$ -  
 627 estradiol-inducible promoter. Addition of higher  $\beta$ -estradiol concentrations leads to a prolonged G1-phase  
 628 resulting in bigger cell volumes in asynchronous steady state populations. II.) A *cln1/2/3* deletion strain  
 629 with *Cln1* expressed from a  $\beta$ -estradiol-inducible promoter was used (Ewald et al., 2016). In this strain,  
 630  $\beta$ -estradiol is necessary for cell proliferation and removal leads to a G1-arrest and continuously increasing  
 631 cell volumes. b) mtDNA copy number as a function of cell volume in asynchronous steady state  
 632 populations. Haploid and diploid wild-type (open symbols) and *Whi5*-inducible strains (filled symbols) in  
 633 the absence or presence of different  $\beta$ -estradiol concentrations were grown on SCGE (dashed line) or  
 634 SCD medium (solid line). After total DNA extraction, mtDNA copy number was determined by measuring

635 the relative concentration of mtDNA and nuclear DNA. mtDNA concentration was normalized on nuclear  
636 DNA concentration and the budding index was used to estimate nuclear DNA copies per cell. Mean cell  
637 volumes of cell populations were measured with a Coulter counter. **c)** mtDNA copy numbers as a function  
638 of cell volume during G1 arrest. Cells were arrested in G1 and harvested every hour for 6 hours (SCD)  
639 or 8 hours (SCGE), starting 2 hours after  $\beta$ -estradiol removal. mtDNA copy numbers were measured with  
640 qPCR, cell volumes were measured with a Coulter counter. Lines show linear fits to the means. Error  
641 bars indicate standard deviations of at least 3 replicates (**b, c**).

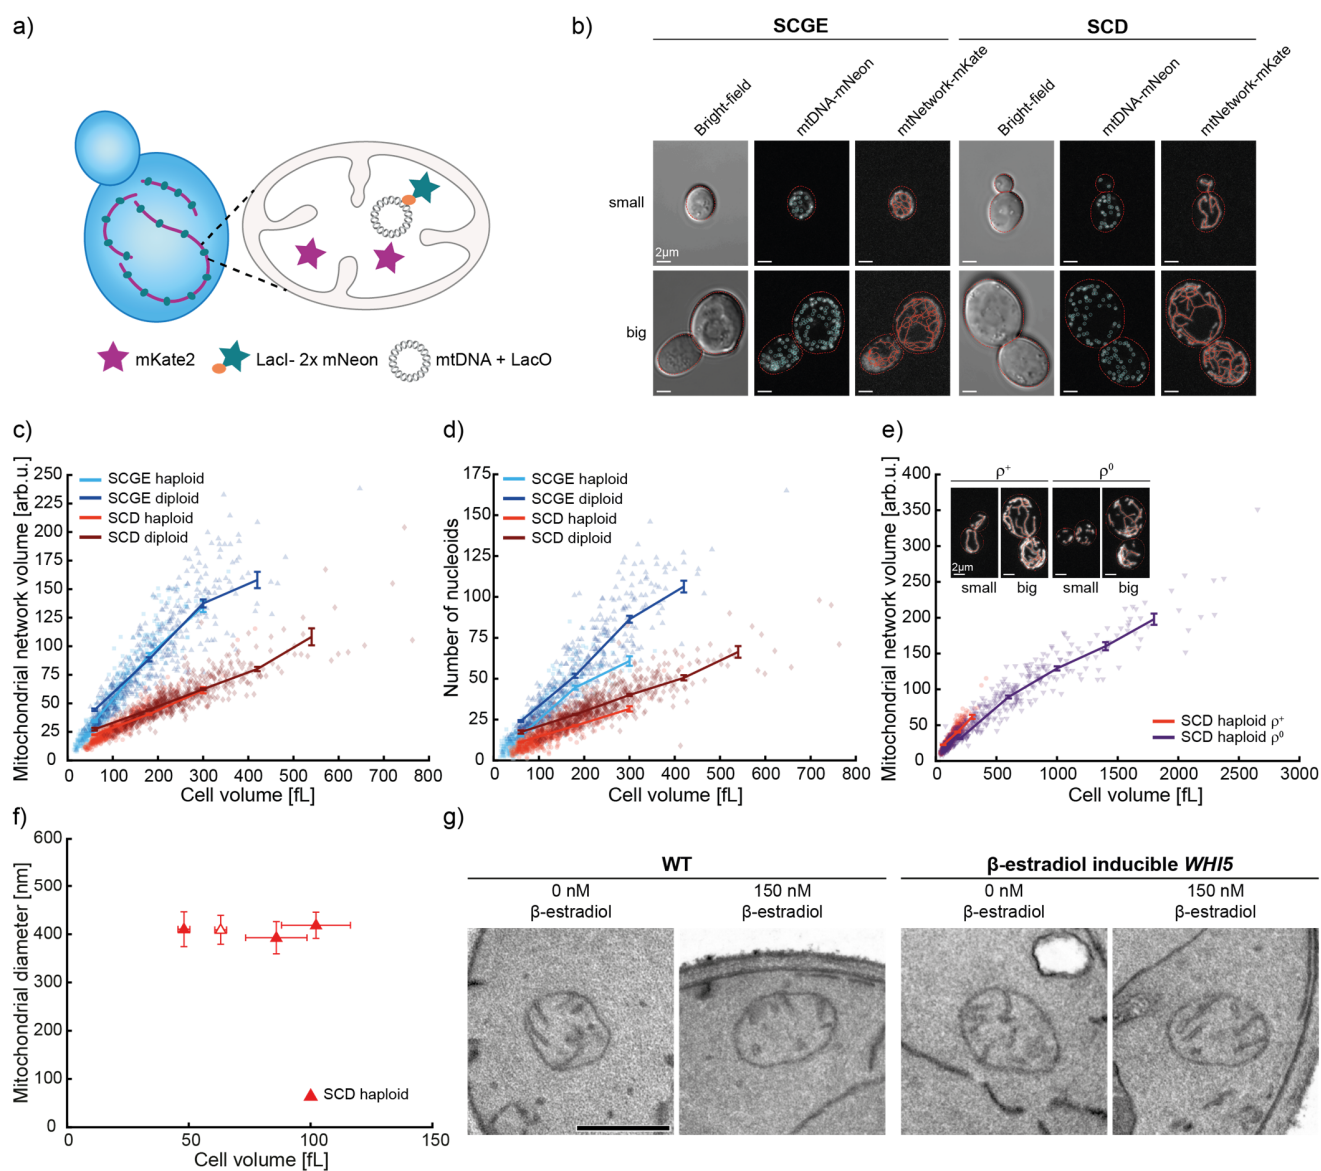

642

643 **Figure 2. Number of nucleoids and mitochondrial network volume increase with cell volume. a)**

644 For live-cell imaging, strains with LacO-repeats integrated into mtDNA were used (Osman et al. 2015).

645 LacI-mNeon was expressed from nuclear DNA and targeted to mitochondrial matrix where it binds LacO-

646 repeats. By expressing mitochondrially targeted mKate2, the mitochondrial matrix was visualized. **b)**

647 Representative bright-field and confocal live-cell images (maximum intensity projections) of *Whi5*-

648 inducible diploid cells without (small) or with 60 nM  $\beta$ -estradiol (big) are shown together with cell and

649 mitochondrial network segmentations as well as identified mtDNA foci. Note that the skeletonization of

650 the segmentation mitochondrial network was only used here for visual representation. Corresponding  
651 images without network segmentation and nucleoid detection are shown in Supplementary Fig. 3a. **c)**  
652 Number of nucleoids per cell as a function of cell volume for *Whi5*-inducible cells grown on SCGE and  
653 SCD medium with different  $\beta$ -estradiol concentrations. **d)** Mitochondrial network volume as a function of  
654 cell volume, for the same cells as in c. **e)** The increase of mitochondrial network volume with cell volume  
655 does not depend on mtDNA. *MIP1* was deleted in a *Whi5*-inducible haploid strain to generate a  $\rho^0$  strain.  
656 Mitochondrial network volume is shown as a function of cell volume and compared to  $\rho^+$  cells of the  
657 parental strain (data from 2d). Cells were grown on SCD. Inset shows representative images.  
658 Corresponding images without network segmentation are shown in Supplementary Fig. 3b. **b-e)** Image  
659 analysis was performed in 3D. Per condition, 3 biological replicates with  $n=50$  images each were  
660 analyzed (total  $n=150$ ). Lines connect binned means (shown at the center of the respective bin) with error  
661 bars indicating standard errors. **f-g)** Wild-type (open symbol) and *Whi5*-inducible haploid cells (filled  
662 symbols) were grown in SCD containing different concentrations of  $\beta$ -estradiol. Cells were chemically  
663 fixed and analyzed by transmission electron microscopy. **f)** Mitochondrial diameter as a function of cell  
664 volume. Per strain, condition, and replicate, the diameter of 100 mitochondria was measured. Cell  
665 volumes were calculated from DIC images taken from the same cultures. Shown is the mean of the  
666 means from three experiments, error bars indicate standard deviations of the means. **g)** Representative  
667 electron micrographs of wild-type (WT) and *Whi5*-inducible cells grown in SCD medium either without or  
668 with 150 nM  $\beta$ -estradiol. Scale bars represent 500 nm.

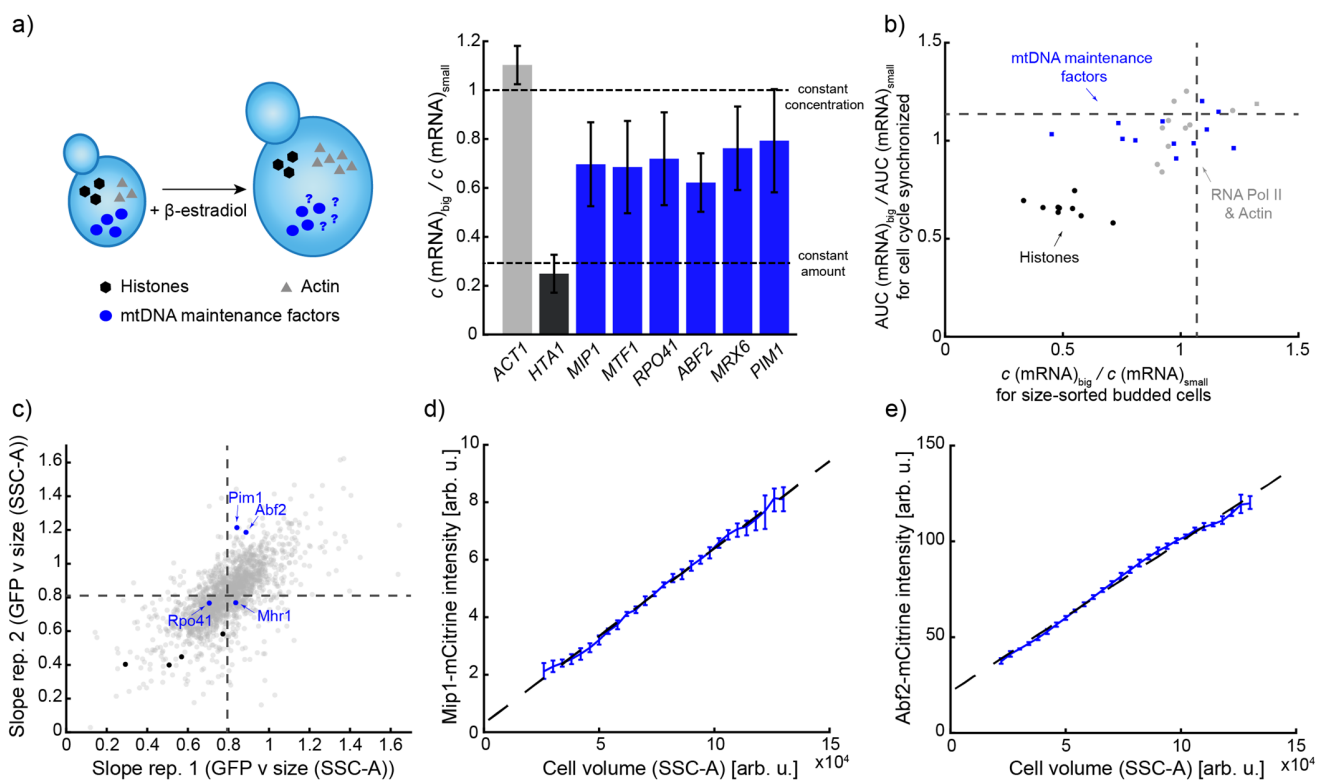

669

670 **Figure 3. Amount of nuclear encoded mtDNA maintenance factors increases with cell volume. a)**

671 mRNA amounts of nuclear encoded mitochondrial proteins increase with cell volume. Cells were grown

672 on SCGE with 0 (small) or 30 nM  $\beta$ -estradiol (big), followed by total RNA extraction and RT-qPCR. mRNA

673 concentrations were normalized on *RDN18* and the ratio of concentrations in big (30 nM) and small (0

674 nM) haploid cell populations were calculated. Bars indicate mean of 3 replicates with error bars indicating

675 standard deviations. Cell volumes were measured with a Coulter counter to estimate the concentration

676 ratio expected for an mRNA that is maintained at constant amount. *MIP1*, *MTF1*, *RPO41*, *ABF2*, *MRX6*

677 and *PIM1* data were generated from RNA samples from Claude et al., 2021. *ACT1* and *HTA1*

678 measurements were directly taken from Claude et al., 2021. **b)** Concentration of nuclear transcripts

679 encoding for proteins involved in mitochondrial mtDNA maintenance are largely constant with cell volume

680 in two transcriptomics data-sets from (Swaffer et al., 2021a): The ratios in big and small cells of the

681 relative expression in size-sorted budded cells, and of the Area Under the Curve (AUC) of the relative

682 expression during cell cycle progression after different durations of G1 arrest are shown for mitochondrial

683 proteins (blue), control genes (RNA polymerase II and *ACT1*) known to scale with cell volume (grey), and  
684 histones (black), whose concentration decreases in big cells. Medians of all transcripts are shown as  
685 dashed lines. **c)** Analysis of the cell-volume-dependence of GFP-fusion proteins performed by Swaffer  
686 et al. based on data by Parts et al. (Parts et al., 2014). The normalized slope of a linear fit to the GFP  
687 intensity as a function of cell size (SSC-A) for budded cells in 2 biological replicates was used to estimate  
688 the cell-volume-dependence for each fusion protein. Similar to most proteins (grey), the amount of  
689 mtDNA maintenance factors (blue) increases roughly in direct proportion with cell volume. In contrast,  
690 the concentration of histones (black) decreases in big cells. Mean slopes for all fusion proteins included  
691 in the data set are shown as dashed lines. **d-e)** Flow-cytometry was used to measure total cellular  
692 mCitrine fluorescence intensity in haploid strains in which either *MIP1* (d) or *ABF2* (e) were endogenously  
693 tagged. SSC-A-signal was used as a measurement for cell volume (Supplementary Fig. 6). Binned  
694 means after background correction using a non-fluorescent strain are shown with estimated experimental  
695 errors (see methods for details). Dashed lines show linear fits to the binned means.

696



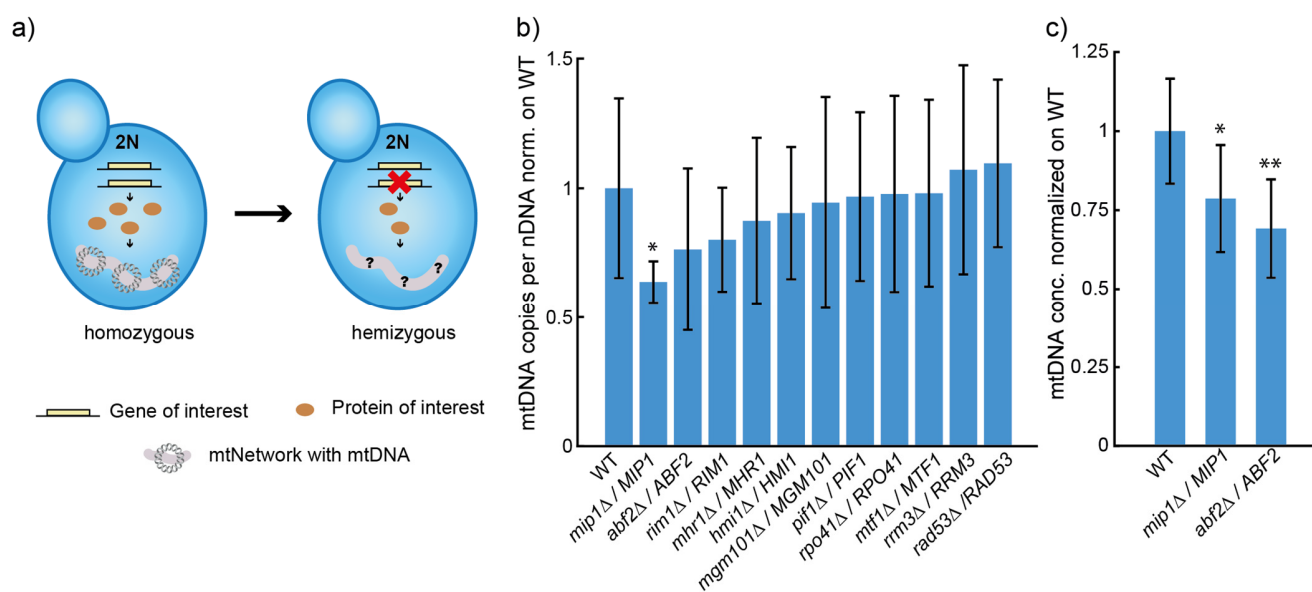

697

698 **Figure 4. Hemizygous screen identifies limiting factors for mtDNA maintenance.** **a)** To reduce the  
 699 expression level of potentially limiting mtDNA maintenance factors, hemizygous diploid strains were  
 700 constructed by deleting one allele of the gene of interest. **b)** Hemizygous diploid strains were grown on  
 701 SCGE. mtDNA copy number per nuclear DNA as determined by DNA-qPCR were normalized on wild-  
 702 type. Bars represent the mean of at least 3 replicates and error bars indicate standard errors. **c)**  
 703 Independent validation of hemizygous *MIP1* and *ABF2* strains shown as mtDNA concentration (mtDNA  
 704 copy number per cell / cell volume) normalized on WT. Significances were determined by a two-tailed,  
 705 two-sample t test (\*  $p < 0.05$ , \*\*  $p < 0.01$ ).

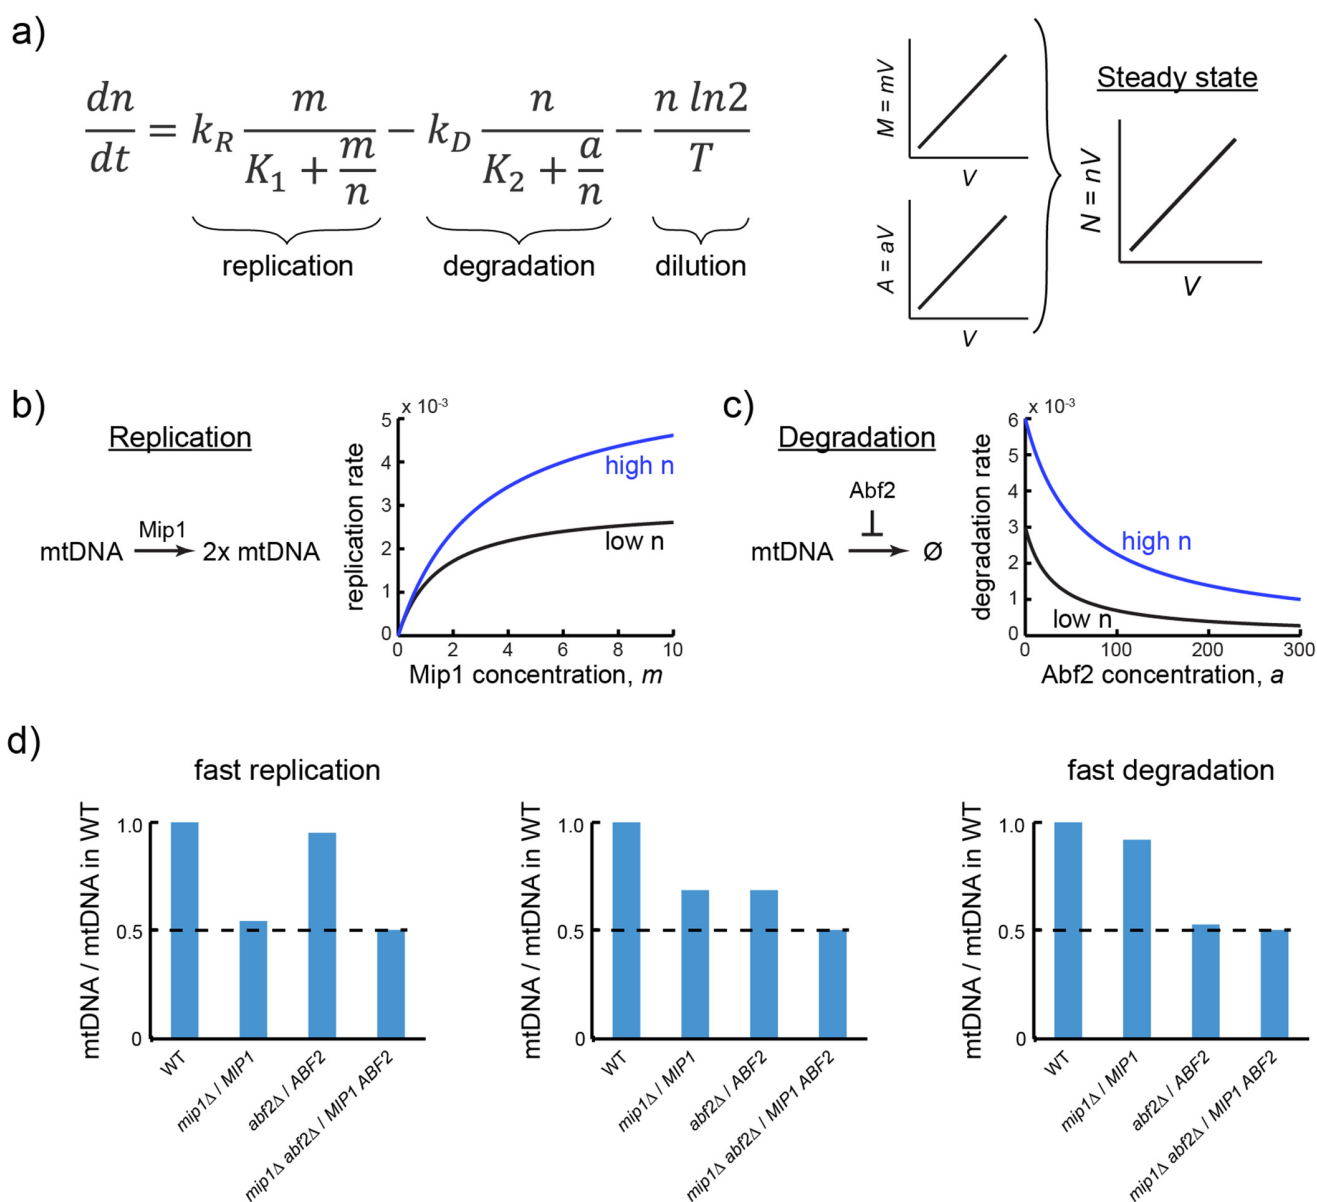

706

707 **Figure 5. Mathematical model shows that limiting factors can couple mtDNA copy number to cell**  
 708 **volume. a)** The dynamic change of mtDNA concentration,  $n$ , is determined by mtDNA replication,  
 709 degradation, and dilution due to cell growth. Cell growth is modeled as exponential. **b)** Replication is  
 710 modeled as being limited by the mtDNA polymerase Mip1 at low Mip1 concentrations,  $m$ , and by  $n$  for  
 711 saturating  $m$ . **c)** In the absence of Abf2, mtDNA degradation is modeled as an exponential decay.  
 712 Increasing ratios of Abf2 concentration,  $a$ , and  $n$ , result in a stabilization of mtDNA, asymptotically  
 713 approaching complete stability. **d)** Hemizygous deletions of *MIP1* or *ABF2* in diploid strains are modeled

714 by reducing the concentrations  $m$  or  $a$ , respectively, to 50%. Depending on the model parameters, single  
715 hemizygotes have mtDNA copy numbers between 50% to 100% of the wild-type. Independent of the  
716 model parameters, a double hemizygote always has a mtDNA copy number reduced to 50%.

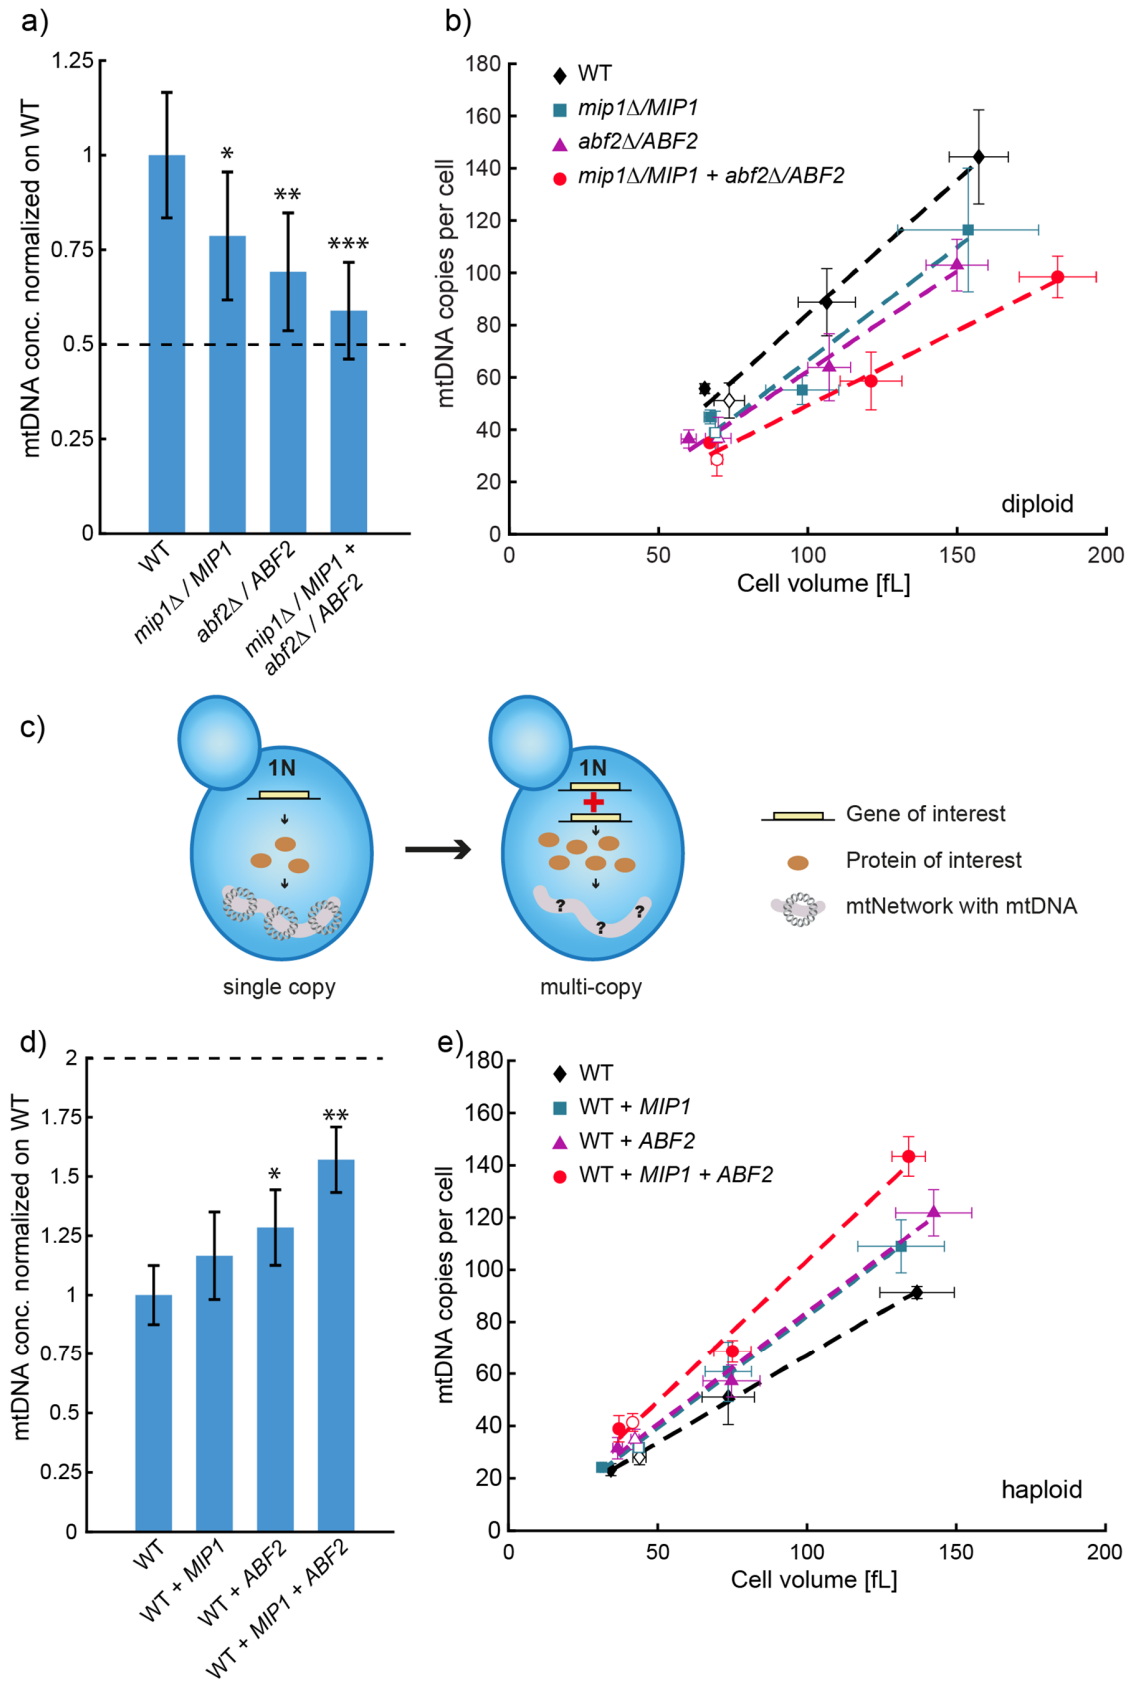

718 **Figure 6. mtDNA copy number is modulated by concentrations of mtDNA maintenance factors. a)**  
719 mtDNA copy numbers per cell as determined by DNA-qPCR of single (data from Fig. 4c) and double  
720 hemizygous *MIP1* and *ABF2* strains normalized on wild-type. **b)** mtDNA copy number per cell determined  
721 by DNA-qPCR in non-inducible (data from b) and *Whi5*-inducible hemizygous strains. Error bars indicate  
722 standard deviations. Lines indicate linear fits of the means. **c-e)** Additional copies of *MIP1* and/or *ABF2*  
723 were endogenously integrated into wild-type and *Whi5*-inducible haploid strains. mtDNA copy number  
724 was determined by DNA-qPCR and mean cell volume was measured with a Coulter counter. mtDNA  
725 copy number per cell normalized on wild-type are shown for the non-inducible strains in **d**. mtDNA copy  
726 numbers per cell for *Whi5*-inducible and non-inducible strains are shown in **e**. Significances were  
727 determined by a two-tailed t-test (\*  $p < 0.05$ , \*\*  $p < 0.01$ , \*\*\*  $p < 0.001$ ).

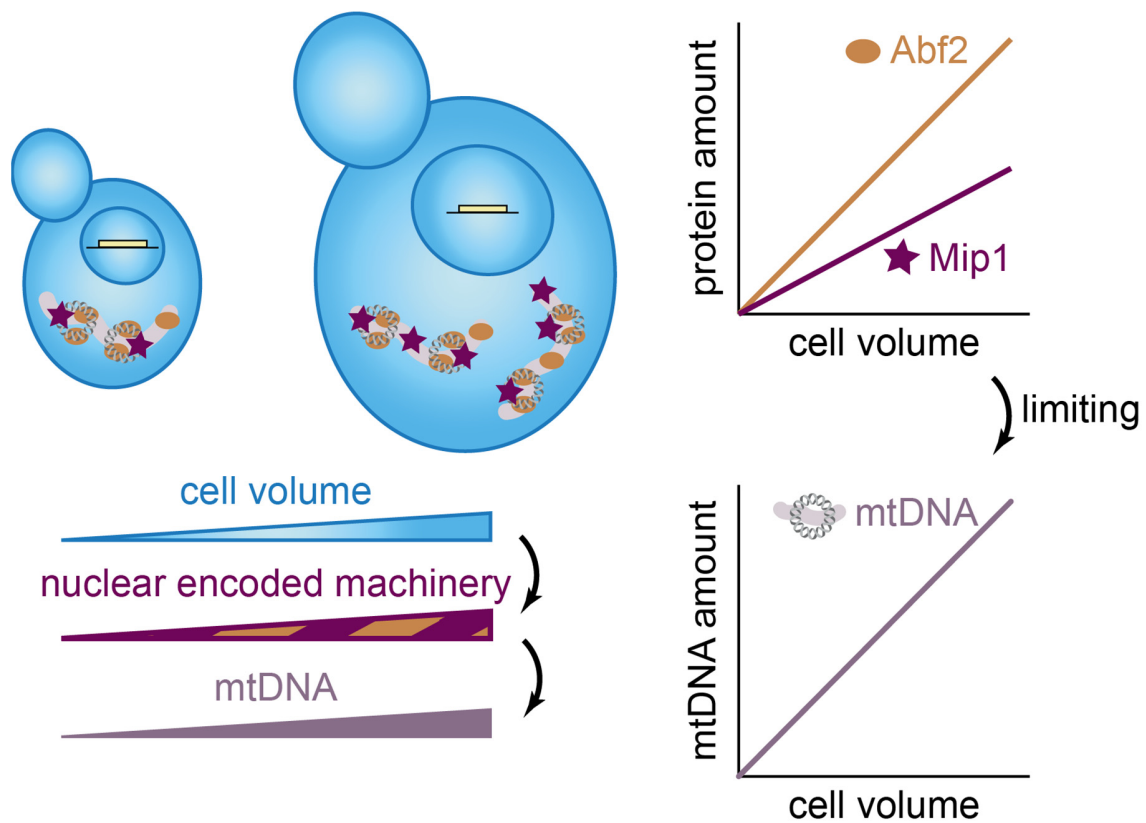

728

729 **Figure 7. Illustration of the limiting-machinery mechanism for mtDNA homeostasis during cell**  
730 **growth.** Cell volume sets the abundance of the nuclear encoded mtDNA maintenance machinery by  
731 global regulation of gene expression. This includes the mitochondrial DNA polymerase Mip1 and the  
732 packaging factor Abf2, whose amount increases with cell volume, and whose abundance has a direct  
733 impact on mtDNA amounts. Thus, controlling limiting mtDNA maintenance factors by global regulation of  
734 gene expression with cell volume provides a mechanism of how mtDNA homeostasis is achieved during  
735 cell growth.

736 **Bibliography**

- 737 Aretz, I., Jakubke, C., and Osman, C. (2020). Power to the daughters – mitochondrial and mtDNA transmission  
738 during cell division. *Biological Chemistry* *401*, 533–546.
- 739 Chatre, L., and Ricchetti, M. (2013). Prevalent coordination of mitochondrial DNA transcription and initiation of  
740 replication with the cell cycle. *Nucleic Acids Research* *41*, 3068–3078.
- 741 Claude, K.-L., Bureik, D., Chatzitheodoridou, D., Adarska, P., Singh, A., and Schmoller, K.M. (2021).  
742 Transcription coordinates histone amounts and genome content. *Nature Communications* *12*, 4202.
- 743 Conrad, M.N., and Newlon, C.S. (1982). The regulation of mitochondrial DNA levels in *Saccharomyces*  
744 *cerevisiae*. *Current Genetics* *6*, 147–152.
- 745 Contamine, V., and Picard, M. (2000). Maintenance and Integrity of the Mitochondrial Genome: a Plethora of  
746 Nuclear Genes in the Budding Yeast. *Microbiology and Molecular Biology Reviews* *64*, 281–315.
- 747 Crider, D.G., García-Rodríguez, L.J., Srivastava, P., Peraza-Reyes, L., Upadhyaya, K., Boldogh, I.R., and Pon,  
748 L.A. (2012). Rad53 is essential for a mitochondrial DNA inheritance checkpoint regulating G1 to S progression.  
749 *Journal of Cell Biology* *198*, 793–798.
- 750 Diffley, J.F., and Stillman, B. (1991). A close relative of the nuclear, chromosomal high-mobility group protein  
751 HMG1 in yeast mitochondria. *Proceedings of the National Academy of Sciences* *88*, 7864–7868.
- 752 Ekstrand, M.I., Falkenberg, M., Rantanen, A., Park, C.B., Gaspari, M., Hultenby, K., Rustin, P., Gustafsson,  
753 C.M., and Larsson, N.-G. (2004). Mitochondrial transcription factor A regulates mtDNA copy number in  
754 mammals. *Human Molecular Genetics* *13*, 935–944.
- 755 Ekundayo, B., and Bleichert, F. (2019). Origins of DNA replication. *PLOS Genetics* *15*, e1008320.
- 756 Ewald, J.C., Kuehne, A., Zamboni, N., and Skotheim, J.M. (2016). The Yeast Cyclin-Dependent Kinase Routes  
757 Carbon Fluxes to Fuel Cell Cycle Progression. *Molecular Cell* *62*, 532–545.
- 758 Ghaemmaghami, S., Huh, W.-K., Bower, K., Howson, R.W., Belle, A., Dephoure, N., O’Shea, E.K., and  
759 Weissman, J.S. (2003). Global analysis of protein expression in yeast. *Nature* *425*, 737–741.
- 760 Göke, A., Schrott, S., Mizrak, A., Belyy, V., Osman, C., and Walter, P. (2020). Mrx6 regulates mitochondrial  
761 DNA copy number in *Saccharomyces cerevisiae* by engaging the evolutionarily conserved Lon protease Pim1.  
762 *Molecular Biology of the Cell* *31*, 527–545.
- 763 Gustafsson, C.M., Falkenberg, M., and Larsson, N.-G. (2016). Maintenance and Expression of Mammalian  
764 Mitochondrial DNA. *Annual Review of Biochemistry* *85*, 133–160.
- 765 Jajoo, R., Jung, Y., Huh, D., Viana, M.P., Rafelski, S.M., Springer, M., and Paulsson, J. (2016). Accurate  
766 concentration control of mitochondria and nucleoids. *Science* *351*, 169–172.
- 767 Kukat, C., Wurm, C.A., Spahr, H., Falkenberg, M., Larsson, N.-G., and Jakobs, S. (2011). Super-resolution  
768 microscopy reveals that mammalian mitochondrial nucleoids have a uniform size and frequently contain a single  
769 copy of mtDNA. *Proceedings of the National Academy of Sciences* *108*, 13534–13539.
- 770 Kukhtevich, I.V., Lohrberg, N., Padovani, F., Schneider, R., and Schmoller, K.M. (2020). Cell size sets the  
771 diameter of the budding yeast contractile ring. *Nature Communications* *11*, 2952.

- 772 Lanz, M.C., Zatulovskiy, E., Swaffer, M.P., Zhang, L., Zhang, S., You, D.S., Marinov, G., McAlpine, P., Elias,  
773 J.E., and Skotheim, J.M. (2021). Increasing cell size remodels the proteome and promotes senescence. *BioRxiv*,  
774 DOI: 10.1101/2021.07.29.454227.
- 775 Larsson, N.-G., Wang, J., Wilhelmsson, H., Oldfors, A., Rustin, P., Lewandoski, M., Barsh, G.S., and Clayton,  
776 D.A. (1998). Mitochondrial transcription factor A is necessary for mtDNA maintenance and embryogenesis in mice.  
777 *Nature Genetics* 18, 231–236.
- 778 Lee, E., and Johnson, B.F. (1977). Volume-related mitochondrial deoxyribonucleic acid synthesis in zygotes and  
779 vegetative cells of *Saccharomyces cerevisiae*. *Journal of Bacteriology* 129, 1066–1071.
- 780 Lee, S., Kim, S., Sun, X., Lee, J.-H., and Cho, H. (2007). Cell cycle-dependent mitochondrial biogenesis and  
781 dynamics in mammalian cells. *Biochemical and Biophysical Research Communications* 357, 111–117.
- 782 Li, C.H., and Tam, P.K.S. (1998). An iterative algorithm for minimum cross entropy thresholding. *Pattern*  
783 *Recognition Letters* 19, 771–776.
- 784 Ling, F., and Yoshida, M. (2020). Rolling-Circle Replication in Mitochondrial DNA Inheritance: Scientific  
785 Evidence and Significance from Yeast to Human Cells. *Genes* 11, 514.
- 786 Marguerat, S., and Bähler, J. (2012). Coordinating genome expression with cell size. *Trends in Genetics* 28, 560–  
787 565.
- 788 Matsushima, Y., Matsumura, K., Ishii, S., Inagaki, H., Suzuki, T., Matsuda, Y., Beck, K., and Kitagawa, Y.  
789 (2003). Functional Domains of Chicken Mitochondrial Transcription Factor A for the Maintenance of  
790 Mitochondrial DNA Copy Number in Lymphoma Cell Line DT40. *Journal of Biological Chemistry* 278, 31149–  
791 31158.
- 792 Miettinen, T.P., and Björklund, M. (2016). Cellular Allometry of Mitochondrial Functionality Establishes the  
793 Optimal Cell Size. *Developmental Cell* 39, 370–382.
- 794 Miettinen, T.P., Pessa, H.K.J., Caldez, M.J., Fuhrer, T., Diril, M.K., Sauer, U., Kaldis, P., and Björklund, M.  
795 (2014). Identification of Transcriptional and Metabolic Programs Related to Mammalian Cell Size. *Current*  
796 *Biology* 24, 598–608.
- 797 Muellner, J., and Schmidt, K.H. (2020). Yeast Genome Maintenance by the Multifunctional PIF1 DNA Helicase  
798 Family. *Genes* 11, 224.
- 799 Newton, C.S., and Fangman, W.L. (1975). Mitochondrial DNA synthesis in cell cycle mutants of *saccharomyces*  
800 *cerevisiae*. *Cell* 5, 423–428.
- 801 Osman, C., Noriega, T.R., Okreglak, V., Fung, J.C., and Walter, P. (2015). Integrity of the yeast mitochondrial  
802 genome, but not its distribution and inheritance, relies on mitochondrial fission and fusion. *Proceedings of the*  
803 *National Academy of Sciences* 112, E947–E956.
- 804 Ottoz, D.S.M., Rudolf, F., and Stelling, J. (2014). Inducible, tightly regulated and growth condition-independent  
805 transcription factor in *Saccharomyces cerevisiae*. *Nucleic Acids Research* 42, e130–e130.
- 806 Padovani, F., Mairhörmann, B., Falter-Braun, P., Lengfeld, J., and Schmoller, K.M. (2021). Cell-ACDC: a user-  
807 friendly toolset embedding state-of-the-art neural networks for segmentation, tracking and cell cycle annotations  
808 of live-cell imaging data. *BioRxiv*, DOI: 10.1101/2021.09.28.462199.
- 809 Padovan-Merhar, O., Nair, G.P., Biaisch, A.G., Mayer, A., Scarfone, S., Foley, S.W., Wu, A.R., Churchman,



- 810 L.S., Singh, A., and Raj, A. (2015). Single mammalian cells compensate for differences in cellular volume and  
811 DNA copy number through independent global transcriptional mechanisms. *Molecular Cell* 58, 339–352.
- 812 Parts, L., Liu, Y.-C., Tekkedil, M.M., Steinmetz, L.M., Caudy, A.A., Fraser, A.G., Boone, C., Andrews, B.J., and  
813 Rosebrock, A.P. (2014). Heritability and genetic basis of protein level variation in an outbred population. *Genome*  
814 *Research* 24, 1363–1370.
- 815 Perkins, E.M., and McCaffery, J.M. (2007). Conventional and Immunoelectron Microscopy of Mitochondria. In  
816 *Mitochondria*, D. Leister, and J.M. Herrmann, eds. (Totowa, NJ: Humana Press), pp. 467–483.
- 817 Petes, T.D., and Fangman, W.L. (1973). Preferential synthesis of yeast mitochondrial DNA in alpha factor-  
818 arrested cells. *Biochemical and Biophysical Research Communications* 55, 603–609.
- 819 Posakony, J., England, J., and Attardi, G. (1977). Mitochondrial growth and division during the cell cycle in HeLa  
820 cells. *Journal of Cell Biology* 74, 468–491.
- 821 Rafelski, S.M., Viana, M.P., Zhang, Y., Chan, Y.-H.M., Thorn, K.S., Yam, P., Fung, J.C., Li, H., Costa, L. d. F.,  
822 and Marshall, W.F. (2012). Mitochondrial Network Size Scaling in Budding Yeast. *Science* 338, 822–824.
- 823 Santos, A., Wernersson, R., and Jensen, L.J. (2015). Cyclebase 3.0: a multi-organism database on cell-cycle  
824 regulation and phenotypes. *Nucleic Acids Research* 43, D1140–D1144.
- 825 Sasaki, T., Sato, Y., Higashiyama, T., and Sasaki, N. (2017). Live imaging reveals the dynamics and regulation of  
826 mitochondrial nucleoids during the cell cycle in Fucci2-HeLa cells. *Scientific Reports* 7, 11257.
- 827 Schindelin, J., Arganda-Carreras, I., Frise, E., Kaynig, V., Longair, M., Pietzsch, T., Preibisch, S., Rueden, C.,  
828 Saalfeld, S., Schmid, B., et al. (2012). Fiji: an open-source platform for biological-image analysis. *Nature*  
829 *Methods* 9, 676–682.
- 830 Schmoller, K.M., and Skotheim, J.M. (2015). The Biosynthetic Basis of Cell Size Control. *Trends in Cell Biology*  
831 25, 793–802.
- 832 Schmoller, K.M., Turner, J.J., Kõivomägi, M., and Skotheim, J.M. (2015). Dilution of the cell cycle inhibitor  
833 Whi5 controls budding-yeast cell size. *Nature* 526, 268–272.
- 834 Sclafani, R.A., and Holzen, T.M. (2007). Cell Cycle Regulation of DNA Replication. *Annual Review of Genetics*  
835 41, 237–280.
- 836 Sedman, T., Kuusk, S., Kivi, S., and Sedman, J. (2000). A DNA Helicase Required for Maintenance of the  
837 Functional Mitochondrial Genome in *Saccharomyces cerevisiae*. *Molecular and Cellular Biology* 20, 1816–1824.
- 838 Springer, M., Weissman, J.S., and Kirschner, M.W. (2010). A general lack of compensation for gene dosage in  
839 yeast. *Molecular Systems Biology* 6, 368.
- 840 Stringer, C., Wang, T., Michaelos, M., and Pachitariu, M. (2021). Cellpose: a generalist algorithm for cellular  
841 segmentation. *Nature Methods* 18, 100–106.
- 842 Stumpf, J.D., Bailey, C.M., Spell, D., Stillwagon, M., Anderson, K.S., and Copeland, W.C. (2010). *mip1*  
843 containing mutations associated with mitochondrial disease causes mutagenesis and depletion of mtDNA in  
844 *Saccharomyces cerevisiae*. *Human Molecular Genetics* 19, 2123–2133.
- 845 Sun, X.-M., Bowman, A., Priestman, M., Bertaux, F., Martinez-Segura, A., Tang, W., Whilding, C., Dormann,  
846 D., Shahrezaei, V., and Marguerat, S. (2020). Size-Dependent Increase in RNA Polymerase II Initiation Rates  
847 Mediates Gene Expression Scaling with Cell Size. *Current Biology* 30, 1217-1230.e7.

- 848 Swaffer, M.P., Kim, J., Chandler-Brown, D., Langhinrichs, M., Marinov, G.K., Greenleaf, W.J., Kundaje, A.,  
849 Schmoller, K.M., and Skotheim, J.M. (2021a). Transcriptional and chromatin-based partitioning mechanisms  
850 uncouple protein scaling from cell size. *Molecular Cell* 1097-2765(21)00836-4.
- 851 Swaffer, M.P., Marinov, G.K., Zheng, H., Jones, A.W., Greenwood, J., Kundaje, A., Snijders, A.P., Greenleaf,  
852 W.J., Reyes-Lamothe, R., and Skotheim, J.M. (2021b). RNA polymerase II dynamics and mRNA stability  
853 feedback determine mRNA scaling with cell size. *BioRxiv*, DOI: 10.1101/2021.09.20.461005.
- 854 Taylor, S.D., Zhang, H., Eaton, J.S., Rodeheffer, M.S., Lebedeva, M.A., O'Rourke, T.W., Siede, W., and Shadel,  
855 G.S. (2005). The Conserved Mec1/Rad53 Nuclear Checkpoint Pathway Regulates Mitochondrial DNA Copy  
856 Number in *Saccharomyces cerevisiae*. *Molecular Biology of the Cell* 16, 3010–3018.
- 857 Torres, E.M., Springer, M., and Amon, A. (2016). No current evidence for widespread dosage compensation in *S.*  
858 *cerevisiae*. *ELife* 5, e10996.
- 859 Tyynismaa, H., Sembongi, H., Bokori-Brown, M., Granycome, C., Ashley, N., Poulton, J., Jalanko, A., Spelbrink,  
860 J.N., Holt, I.J., and Suomalainen, A. (2004). Twinkle helicase is essential for mtDNA maintenance and regulates  
861 mtDNA copy number. *Human Molecular Genetics* 13, 3219–3227.
- 862 Unger, A.-K., Geimer, S., Harner, M., Neupert, W., and Westermann, B. (2017). Analysis of Yeast Mitochondria  
863 by Electron Microscopy. In *Mitochondria*, D. Mokranjac, and F. Perocchi, eds. (New York, NY: Springer New  
864 York), pp. 293–314.
- 865 Van Dyck, E., Foury, F., Stillman, B., and Brill, S.J. (1992). A single-stranded DNA binding protein required for  
866 mitochondrial DNA replication in *S. cerevisiae* is homologous to *E. coli* SSB. *The EMBO Journal* 11, 3421–3430.
- 867 Viikov, K., Jasnovidova, O., Tamm, T., and Sedman, J. (2012). C-Terminal Extension of the Yeast Mitochondrial  
868 DNA Polymerase Determines the Balance between Synthesis and Degradation. *PLoS ONE* 7, e33482.
- 869 van der Walt, S., Schönberger, J.L., Nunez-Iglesias, J., Boulogne, F., Warner, J.D., Yager, N., Gouillart, E., Yu,  
870 T., and scikit-image contributors (2014). scikit-image: image processing in Python. *PeerJ* 2, e453.
- 871 Wells, J.R. (1974). Mitochondrial DNA synthesis during the cell cycle of *Saccharomyces cerevisiae*.  
872 *Experimental Cell Research* 85, 278–286.
- 873 Woodward, R., and Gull, K. (1990). Timing of nuclear and kinetoplast DNA replication and early morphological  
874 events in the cell cycle of *Trypanosoma brucei*. *Journal of Cell Science* 95, 49–57.
- 875 Wu, C.-Y., Rolfe, P.A., Gifford, D.K., and Fink, G.R. (2010). Control of transcription by cell size. *PLoS Biology*  
876 8, e1000523.
- 877 Zelenaya-Troitskaya, O., Newman, S.M., Okamoto, K., Perlman, P.S., and Butow, R.A. (1998). Functions of the  
878 high mobility group protein, Abf2p, in mitochondrial DNA segregation, recombination and copy number in  
879 *Saccharomyces cerevisiae*. *Genetics* 148, 1763–1776.
- 880 Zhurinsky, J., Leonhard, K., Watt, S., Marguerat, S., Bähler, J., and Nurse, P. (2010). A coordinated global  
881 control over cellular transcription. *Current Biology: CB* 20, 2010–2015.
- 882
